# Supplementary material
Source: PubMed Central journal article supplement (PMC5613659)
Supplement: NIHMS875825-supplement-Supplemental.pdf [file NIHMS875825-supplement-Supplemental.pdf]

## Supplementary Online Content

Rotenstein LS, Ramos MA, Torre M, et al. Prevalence of depression, depressive symptoms, and suicidal ideation among medical students: a systematic review and meta-analysis. *JAMA*. doi:10.1001/jama.2016.17324

**eMethods 1.** Search strategy used in the current systematic review and meta-analysis.

**eMethods 2.** Modified Newcastle-Ottawa risk of bias scoring guide.

**eTable 1.** Summary characteristics of the studies included in this systematic review and meta-analysis.

**eTable 2.** Newcastle-Ottawa risk of bias scores for the 195 studies included in this systematic review and meta-analysis.

**eTable 3.** Sensitivity analysis of the prevalence of depression or depressive symptoms among medical students.

**eTable 4.** Within-instrument heterogeneity analyses of studies reporting on the prevalence of depression or depressive symptoms among medical students.

**eTable 5.** Sensitivity analysis of the prevalence of suicidal ideation among medical students.

**eTable 6.** Sensitivities and specificities of commonly used instruments for diagnosing major depressive disorder.

**eFigure 1.** Meta-analysis of the percentage of medical students who screened positive for depression and sought psychiatric or other mental health treatment.

**eFigure 2.** Assessment of small study effects by funnel plot for the 183 studies reporting on depression or depressive symptom prevalence.

**eFigure 3.** Assessment of small study effects by funnel plot for the 24 studies reporting on suicidal ideation prevalence.

### eReferences

This supplementary material has been provided by the authors to give readers additional information about their work.

**eMethods 1.** Search strategy used in the current systematic review and meta-analysis.

***Depression***

1. Depress\*
2. Depressed
3. Depression
4. Depression [MeSH]
5. Depressive disorder [MeSH]
6. Depressive disorder, major [MeSH]
7. Ideation
8. Major depression
9. Major depressive disorder
10. MDD
11. Sadness
12. Suicid\*
13. Suicide [MeSH]
14. OR / 1 – 13

***Medical students***

15. Clinical student\*
16. Education, medical [MeSH]
17. Education, medical, undergraduate [MeSH]
18. Med student\*
19. Medical student\*
20. Medical trainee\*
21. Preclinical student\*
22. Student doctor\*
23. Student physician\*
24. Undergraduate medic\*
25. OR / 15 – 24

***Study design***

26. Cohort design
27. Cohort stud\*
28. Cohort studies [MeSH]
29. Cross-sectional analysis
30. Cross-sectional design
31. Cross-sectional stud\*
32. Cross-sectional studies [MeSH]
33. Epidemiologic stud\*
34. Epidemiologic studies [MeSH]
35. Incidence
36. Longitudinal design
37. Longitudinal stud\*
38. Meta-analy\*
39. Meta-analysis [Publication Type]
40. Observational stud\*
41. Population stud\*
42. Prevalence
43. Prospective design
44. Prospective stud\*
45. Prospective studies [MeSH]
46. Retrospective design
47. Retrospective stud\*
48. Retrospective studies [MeSH]
49. Review
50. Review [Publication Type]
51. OR / 26 – 51

**Combined search:** #14 AND #25 AND #51

**Legend:** MeSH indicates Medical Subject Heading in MEDLINE

**eMethods 2.** Modified Newcastle-Ottawa risk of bias scoring guide.

**(1) Sample representativeness:**

1 point: Population contained multiple class years at multiple schools.

0 points: Population contained either a single class year, a single school, or both.

**(2) Sample size:**

1 point: Sample size was greater than or equal to 200 participants.

0 points: Sample size was less than 200 participants.

**(3) Non-respondents:**

1 point: Comparability between respondent and non-respondent characteristics was established with a satisfactory response rate.

0 points: The comparability between respondents and non-respondents was unsatisfactory, the response rate was unsatisfactory, or there was no description of the response rate or the characteristics of the responders or non-responders.

**(4) Ascertainment of depression or depressive symptoms and suicidal ideation:**

1 point: The study employed a commonly used measurement tool with a valid cutoff score (*e.g.*, BDI  $\geq 10$ , BDI-II  $\geq 14$ , CES-D  $\geq 16$ , HADS-D  $\geq 8$ , PHQ-9  $\geq 10$ , Zung-SDS  $\geq 50$ ).

0 points: The study employed an infrequently used measurement tool, a commonly used measurement tool with an invalid cutoff score, or any tool with published sensitivity/specificity values  $< 70\%$  (*e.g.*, the PRIME-MD screening instrument).

**(5) Quality of descriptive statistics reporting:**

1 point: The study reported descriptive statistics to describe the population (*e.g.*, age, sex, class year) with proper measures of dispersion (*e.g.*, mean, standard deviation).

0 points: The study did not report descriptive statistics, incompletely reported descriptive statistics, or did not report measures of dispersion.

**Legend:** The individual components listed above are summed to generate a total modified Newcastle-Ottawa risk of bias score for each study. Total scores range from 0 to 5. Figure 5 of the manuscript groups studies by the above-mentioned individual components as well as by total score. For the total score grouping, studies were judged to be of low risk of bias ( $\geq 3$  points) or high risk of bias ( $< 3$  points).

**eTable 1. Summary characteristics of the studies included in this systematic review and meta-analysis. (Pages 2-4)**

|                            | <b>n</b> | <b>%</b> |
|----------------------------|----------|----------|
| <b>Study Design</b>        |          |          |
| Cross-sectional            | 17       | 91.8%    |
|                            | 9        | %        |
| Longitudinal               | 16       | 8.2%     |
| <b>Level of Training</b>   |          |          |
| Both                       | 11       | 60.0%    |
|                            | 7        | %        |
| Clinical                   | 19       | 9.7%     |
| Not reported               | 13       | 6.7%     |
| Preclinical                | 46       | 23.6%    |
|                            |          | %        |
| <b>Continent or Region</b> |          |          |
| Africa                     | 9        | 4.6%     |
| Asia                       | 56       | 28.7%    |
|                            |          | %        |
| Eurasia                    | 11       | 5.6%     |
| Europe                     | 28       | 14.4%    |
|                            |          | %        |
| Middle East                | 21       | 10.8%    |
|                            |          | %        |
| North America              | 49       | 25.1%    |
|                            |          | %        |
| Oceania                    | 3        | 1.5%     |
| South America              | 18       | 9.2%     |
| <b>Country</b>             |          |          |
| Australia                  | 1        | 0.5%     |
| Brazil                     | 13       | 6.7%     |
| Canada                     | 2        | 1.0%     |
| Chile                      | 1        | 0.5%     |
| China                      | 11       | 5.6%     |
| Colombia                   | 1        | 0.5%     |
| Dubai                      | 1        | 0.5%     |
| Egypt                      | 5        | 2.6%     |
| Estonia                    | 1        | 0.5%     |
| Ethiopia                   | 1        | 0.5%     |
| France                     | 1        | 0.5%     |
| Germany                    | 6        | 3.1%     |
| Greece                     | 1        | 0.5%     |
| Hong Kong                  | 2        | 1.0%     |
| India                      | 8        | 4.1%     |

|                                                           |    |       |
|-----------------------------------------------------------|----|-------|
| Iran                                                      | 5  | 2.6%  |
| Iraq                                                      | 1  | 0.5%  |
| Israel                                                    | 3  | 1.5%  |
| Korea                                                     | 1  | 0.5%  |
| Lebanon                                                   | 2  | 1.0%  |
| Lithuania                                                 | 1  | 0.5%  |
| Macedonia                                                 | 1  | 0.5%  |
| Malaysia                                                  | 7  | 3.6%  |
| Mexico                                                    | 4  | 2.1%  |
| Multiple Countries                                        | 3  | 1.5%  |
| Nepal                                                     | 3  | 1.5%  |
| Netherlands                                               | 1  | 0.5%  |
| New Zealand                                               | 2  | 1.0%  |
| Nigeria                                                   | 2  | 1.0%  |
| Norway                                                    | 1  | 0.5%  |
| Pakistan                                                  | 15 | 7.7%  |
| Panama                                                    | 1  | 0.5%  |
| Peru                                                      | 2  | 1.0%  |
| Poland                                                    | 2  | 1.0%  |
| Saudi Arabia                                              | 8  | 4.1%  |
| Serbia                                                    | 2  | 1.0%  |
| South Africa                                              | 1  | 0.5%  |
| South Korea                                               | 4  | 2.1%  |
| Sweden                                                    | 3  | 1.5%  |
| Thailand                                                  | 3  | 1.5%  |
| Trinidad and Tobago                                       | 1  | 0.5%  |
| Turkey                                                    | 10 | 5.1%  |
| United Arab Emirates                                      | 1  | 0.5%  |
| United Kingdom                                            | 7  | 3.6%  |
| United States                                             | 42 | 21.5% |
| Vietnam                                                   | 1  | 0.5%  |
| <b>Depression Screening Instrument</b>                    |    |       |
| Aga Khan University Anxiety and Depression Scale (AKUADS) | 5  | 2.7%  |
| Beck Depression Inventory (BDI)                           | 46 | 25.1% |
| Beck Depression Inventory-II (BDI-II)                     | 9  | 4.9%  |
| Beck Depression Inventory-Short Form (BDI-SF)             | 2  | 1.1%  |
| Brief Symptom Inventory-Depression (BSI-DEP)              | 1  | 0.5%  |
| Center for Epidemiological Studies Depression (CES-D)     | 16 | 8.7%  |
| Depression Anxiety Stress Scale-21 (DASS-21)              | 7  | 3.8%  |
| Depression Anxiety Stress Scale-42 (DASS-42)              | 3  | 1.6%  |
| Derogatis Stress Profile (DSP)                            | 1  | 0.5%  |

|                                                                                    |    |       |
|------------------------------------------------------------------------------------|----|-------|
| Diagnostic and Statistical Manual of Mental Disorders IV (DSM-IV) Criteria A and C | 1  | 0.5%  |
| Emotional State Questionnaire (EST-Q)                                              | 1  | 0.5%  |
| General Depression Scale Short Form (ADS-K)                                        | 1  | 0.5%  |
| General Health Questionnaire-12 (GHQ-12)                                           | 8  | 4.4%  |
| General Health Questionnaire-28 (GHQ-28)                                           | 3  | 1.6%  |
| Health-Related Self-Reported Scale (HRSRS)                                         | 1  | 0.5%  |
| Hospital Anxiety and Depression Scale (HADS-D)                                     | 19 | 10.4% |
| Kessler Psychological Distress Scale (K-10)                                        | 2  | 1.1%  |
| Kutcher Adolescent Depression Scale (KADS)                                         | 1  | 0.5%  |
| Major Depression Inventory (MDI)                                                   | 1  | 0.5%  |
| Mini International Neuropsychiatric Interview (MINI)                               | 1  | 0.5%  |
| Minnesota Multiphasic Personality Inventory-Depression Scale (MMPI-D)              | 1  | 0.5%  |
| Patient Health Questionnaire-9 (PHQ-9)                                             | 19 | 10.4% |
| Patient-Reported Outcomes Measurement Information System (PROMIS-T)                | 1  | 0.5%  |
| Primary Care Evaluation of Mental Disorders (PRIME-MD)                             | 14 | 7.7%  |
| Quick Inventory of Depressive Symptomatology (QIDS)                                | 1  | 0.5%  |
| Symptom Checklist 90 (SCL-90)                                                      | 1  | 0.5%  |
| Thai Depression Inventory (TDI)                                                    | 1  | 0.5%  |
| Zung Self-Rating Depression Scale (Zung-SDS)                                       | 15 | 8.2%  |
| Zung Self-Rating Depression Scale-Short Form (Zung-SF)                             | 1  | 0.5%  |
| <b>Suicide Screening Instrument</b>                                                |    |       |
| Beck Scale for Suicidal Ideation (BSI)                                             | 2  | 8.3%  |
| Mini International Neuropsychiatric Interview (MINI)                               | 1  | 4.2%  |
| Suicidal Behaviours Questionnaire-Revised (SBQ-R)                                  | 1  | 4.2%  |
| Suicidal ideation over past 1 month                                                | 1  | 4.2%  |
| Suicidal ideation over past 12 months                                              | 7  | 29.2% |
| Suicidal ideation over past 12 months (GHQ-28)                                     | 3  | 12.5% |
| Suicidal ideation over past 12 months (Meehan)                                     | 4  | 16.7% |
| Suicidal ideation over past 12 months (Paykel)                                     | 1  | 4.2%  |
| Suicidal ideation over past 2 weeks (PHQ)                                          | 2  | 8.3%  |
| Suicidal ideation over past 2 weeks (PRIME-MD)                                     | 2  | 8.3%  |
| <b>Total Newcastle-Ottawa Score</b>                                                |    |       |
| 0                                                                                  | 14 | 7.2%  |
| 1                                                                                  | 50 | 25.6% |
| 2                                                                                  | 79 | 40.5% |

|   |  |    |       |
|---|--|----|-------|
|   |  |    | %     |
| 3 |  | 38 | 19.5% |
| 4 |  | 12 | 6.2%  |
| 5 |  | 2  | 1.0%  |



**eTable 2. Newcastle-Ottawa risk of bias scores for the 195 studies included in this systematic review and meta-analysis. (Pages 5-9)**

| First author, year                      | Representative-ness | Sample Size | Non-respondents | Ascertainment of Depression | Descriptive Statistics | Total |
|-----------------------------------------|---------------------|-------------|-----------------|-----------------------------|------------------------|-------|
| Abdel Wahed WY, 2016 <sup>1</sup>       | 0                   | 1           | 0               | 0                           | 1                      | 2     |
| Adamiak G, 2004 <sup>2</sup>            | 0                   | 1           | 0               | 0                           | 0                      | 1     |
| Aghakhani N, 2011 <sup>3</sup>          | 0                   | 1           | 0               | 1                           | 1                      | 3     |
| Ahmed I, 2009 <sup>4</sup>              | 0                   | 0           | 0               | 1                           | 0                      | 1     |
| Ahmed SA, 2016 <sup>5</sup>             | 1                   | 1           | 0               | 1                           | 1                      | 4     |
| Akbari V, 2014 <sup>6</sup>             | 0                   | 0           | 0               | 0                           | 0                      | 0     |
| Aktekin M, 2001 <sup>7</sup>            | 0                   | 0           | 0               | 0                           | 0                      | 0     |
| Akvardar Y, 2003 <sup>8</sup>           | 1                   | 1           | 0               | 0                           | 1                      | 3     |
| Akvardar Y, 2004 <sup>9</sup>           | 0                   | 0           | 0               | 0                           | 0                      | 0     |
| Al Faris EA, 2012 <sup>10</sup>         | 0                   | 1           | 0               | 1                           | 1                      | 3     |
| Alem A, 2005 <sup>11</sup>              | 0                   | 1           | 0               | 1                           | 0                      | 2     |
| Alexandrino-Silva C, 2009 <sup>12</sup> | 0                   | 1           | 0               | 0                           | 1                      | 2     |
| AlFaris EA, 2014 <sup>13</sup>          | 0                   | 1           | 0               | 1                           | 0                      | 2     |
| Ali FA, 2015 <sup>14</sup>              | 0                   | 0           | 0               | 0                           | 0                      | 0     |
| Alvi T, 2010 <sup>15</sup>              | 0                   | 1           | 0               | 1                           | 1                      | 3     |
| Amaral GF, 2008 <sup>16</sup>           | 0                   | 1           | 0               | 1                           | 0                      | 2     |
| Amir M, 2010 <sup>17</sup>              | 0                   | 1           | 0               | 1                           | 1                      | 3     |
| Amiri L, 2012 <sup>18</sup>             | 0                   | 0           | 0               | 1                           | 1                      | 2     |
| Angkurawaranon C, 2016 <sup>19</sup>    | 0                   | 1           | 0               | 0                           | 1                      | 2     |
| Aniebue PN, 2008 <sup>20</sup>          | 0                   | 1           | 0               | 1                           | 1                      | 3     |
| Ashor AW, 2012 <sup>21</sup>            | 0                   | 1           | 0               | 1                           | 0                      | 2     |
| Ashton CH, 1995 <sup>22</sup>           | 0                   | 1           | 0               | 1                           | 1                      | 3     |
| Aziz NAHA, 2011 <sup>23</sup>           | 0                   | 1           | 0               | 0                           | 1                      | 2     |
| Bahri Y, 2011 <sup>24</sup>             | 0                   | 0           | 0               | 0                           | 0                      | 0     |
| Baldassin S, 2008 <sup>25</sup>         | 0                   | 1           | 1               | 1                           | 1                      | 4     |
| Basnet B, 2012 <sup>26</sup>            | 0                   | 0           | 0               | 1                           | 1                      | 2     |
| Bassols AM, 2014 <sup>27</sup>          | 0                   | 1           | 0               | 0                           | 1                      | 2     |
| Bayati A, 2009 <sup>28</sup>            | 0                   | 0           | 0               | 0                           | 1                      | 1     |
| Baykan Z, 2012 <sup>29</sup>            | 0                   | 0           | 0               | 0                           | 1                      | 1     |
| Berner JE, 2014 <sup>30</sup>           | 0                   | 1           | 0               | 0                           | 1                      | 2     |
| Bore M, 2016 <sup>31</sup>              | 0                   | 0           | 0               | 0                           | 1                      | 1     |
| Borst JM, 2015 <sup>32</sup>            | 1                   | 1           | 0               | 0                           | 1                      | 3     |
| Bunevicius A, 2008 <sup>33</sup>        | 0                   | 1           | 0               | 1                           | 1                      | 3     |
| Camp DL, 1994 <sup>34</sup>             | 0                   | 1           | 0               | 1                           | 0                      | 2     |
| Carter FA, 2014 <sup>35</sup>           | 0                   | 0           | 0               | 0                           | 1                      | 1     |

|                                                 |   |   |   |   |   |   |
|-------------------------------------------------|---|---|---|---|---|---|
| Castaldelli-Maia JM, 2012 <sup>36</sup>         | 0 | 1 | 0 | 0 | 0 | 1 |
| Chan DW, 1991 <sup>37</sup>                     | 0 | 1 | 1 | 1 | 1 | 4 |
| Chan DW, 1992 <sup>38</sup>                     | 0 | 0 | 1 | 0 | 0 | 1 |
| Chandavarkar U, 2007 <sup>39</sup>              | 1 | 1 | 0 | 0 | 0 | 2 |
| Chang E, 2012 <sup>40</sup>                     | 0 | 1 | 0 | 0 | 0 | 1 |
| Chen JQ, 2004 <sup>41</sup>                     | 0 | 1 | 0 | 1 | 1 | 3 |
| Choi J, 2015 <sup>42</sup>                      | 0 | 1 | 0 | 0 | 0 | 1 |
| Clark DC, 1988 <sup>43</sup>                    | 0 | 0 | 0 | 0 | 1 | 1 |
| Costa EF, 2012 <sup>44</sup>                    | 0 | 0 | 0 | 1 | 0 | 1 |
| Dahlin M, 2005 <sup>45</sup>                    | 0 | 1 | 1 | 0 | 0 | 2 |
| Dahlin M, 2011 <sup>46</sup>                    | 0 | 1 | 0 | 0 | 0 | 1 |
| David MA, 2013 <sup>47</sup>                    | 0 | 0 | 0 | 0 | 0 | 0 |
| de Melo Cavestro J, 2006 <sup>48</sup>          | 0 | 1 | 0 | 1 | 1 | 3 |
| de Oliveira e Sousa Leão PB, 2011 <sup>49</sup> | 0 | 0 | 0 | 0 | 1 | 1 |
| De Sousa Lima L, 2010 <sup>50</sup>             | 0 | 0 | 0 | 1 | 0 | 1 |
| Del Ben CM, 2013 <sup>51</sup>                  | 0 | 0 | 0 | 1 | 1 | 2 |
| Dyrbye LN, 2006 <sup>52</sup>                   | 1 | 1 | 0 | 0 | 0 | 2 |
| Dyrbye LN, 2007 <sup>53</sup>                   | 1 | 1 | 0 | 0 | 0 | 2 |
| Dyrbye LN, 2008 <sup>54</sup>                   | 1 | 1 | 0 | 0 | 0 | 2 |
| Dyrbye LN, 2010 <sup>55</sup>                   | 1 | 1 | 0 | 0 | 0 | 2 |
| Dyrbye LN, 2011 <sup>56</sup>                   | 1 | 1 | 0 | 0 | 0 | 2 |
| Dyrbye LN, 2014 <sup>57</sup>                   | 1 | 1 | 0 | 0 | 0 | 2 |
| Dyrbye LN, 2015 <sup>58</sup>                   | 1 | 1 | 0 | 0 | 0 | 2 |
| El-Gilany AH, 2008 <sup>59</sup>                | 1 | 1 | 0 | 0 | 1 | 3 |
| Eller T, 2006 <sup>60</sup>                     | 0 | 1 | 0 | 0 | 1 | 2 |
| Eskin M, 2011 <sup>61</sup>                     | 1 | 1 | 0 | 1 | 1 | 4 |
| Farahangiz S, 2016 <sup>62</sup>                | 0 | 1 | 0 | 0 | 1 | 2 |
| Ghudasara SL, 2011 <sup>63</sup>                | 0 | 1 | 0 | 1 | 0 | 2 |
| Givens JL, 2002 <sup>64</sup>                   | 0 | 0 | 1 | 0 | 0 | 1 |
| Goebert D, 2009 <sup>65</sup>                   | 1 | 1 | 0 | 1 | 0 | 3 |
| Gold JA, 2015 <sup>66</sup>                     | 0 | 0 | 0 | 0 | 0 | 0 |
| Guerrero Lopez JB, 2013 <sup>67</sup>           | 0 | 1 | 0 | 1 | 1 | 3 |
| Gulec M, 2005 <sup>68</sup>                     | 0 | 1 | 0 | 0 | 1 | 2 |
| Gupta S, 2013 <sup>69</sup>                     | 0 | 0 | 0 | 1 | 0 | 1 |
| Guthrie E, 1998 <sup>70</sup>                   | 0 | 0 | 1 | 0 | 0 | 1 |
| Haglund ME, 2009 <sup>71</sup>                  | 0 | 0 | 0 | 1 | 1 | 2 |
| Hardeman RR, 2015 <sup>72</sup>                 | 0 | 1 | 0 | 0 | 0 | 1 |
| Helmert KF, 1997 <sup>73</sup>                  | 0 | 1 | 0 | 0 | 1 | 2 |
| Hendryx MS, 1991 <sup>74</sup>                  | 0 | 0 | 0 | 1 | 1 | 2 |

|                                      |   |   |   |   |   |   |
|--------------------------------------|---|---|---|---|---|---|
| Herzog DB, 1987 <sup>75</sup>        | 0 | 1 | 1 | 1 | 0 | 3 |
| Hirata FC, 2007 <sup>76</sup>        | 0 | 0 | 0 | 0 | 1 | 1 |
| Honney K, 2010 <sup>77</sup>         | 0 | 1 | 0 | 1 | 1 | 3 |
| Ibrahim MB, 2015 <sup>78</sup>       | 0 | 0 | 0 | 0 | 0 | 0 |
| Ibrahim N, 2013 <sup>79</sup>        | 0 | 1 | 0 | 0 | 1 | 2 |
| Ibrahim NK, 2013 <sup>80</sup>       | 0 | 1 | 0 | 0 | 1 | 2 |
| Imran N, 2016 <sup>81</sup>          | 0 | 1 | 0 | 0 | 1 | 2 |
| Inam SB, 2007 <sup>82</sup>          | 0 | 1 | 0 | 0 | 0 | 1 |
| Inam SN, 2003 <sup>83</sup>          | 0 | 0 | 0 | 0 | 0 | 0 |
| Iqbal S, 2015 <sup>84</sup>          | 0 | 1 | 0 | 0 | 1 | 2 |
| Jackson ER, 2016 <sup>85</sup>       | 1 | 1 | 0 | 0 | 0 | 2 |
| Jadoon NA, 2010 <sup>86</sup>        | 0 | 1 | 0 | 0 | 1 | 2 |
| James D, 2013 <sup>87</sup>          | 0 | 1 | 1 | 0 | 0 | 2 |
| Jeong Y, 2010 <sup>88</sup>          | 0 | 0 | 1 | 1 | 0 | 2 |
| Jurkat HB, 2011 <sup>89</sup>        | 0 | 1 | 1 | 0 | 0 | 2 |
| Karaoglu N, 2011 <sup>90</sup>       | 0 | 1 | 0 | 1 | 1 | 3 |
| Kaya M, 2007 <sup>91</sup>           | 0 | 1 | 0 | 0 | 0 | 1 |
| Khan MA, 2015 <sup>92</sup>          | 0 | 0 | 0 | 1 | 0 | 1 |
| Khan MS, 2006 <sup>93</sup>          | 0 | 0 | 0 | 0 | 1 | 1 |
| Khokher S, 2005 <sup>94</sup>        | 0 | 1 | 0 | 1 | 0 | 2 |
| Kim B, 2014 <sup>95</sup>            | 0 | 0 | 0 | 1 | 0 | 1 |
| Kohls N, 2012 <sup>96</sup>          | 1 | 1 | 0 | 0 | 0 | 2 |
| Kongsomboon K, 2010 <sup>97</sup>    | 0 | 1 | 0 | 0 | 0 | 1 |
| Kotter T, 2014 <sup>98</sup>         | 0 | 1 | 0 | 1 | 1 | 3 |
| Kulsoom B, 2015 <sup>99</sup>        | 0 | 1 | 0 | 0 | 0 | 1 |
| Kumar GS, 2012 <sup>100</sup>        | 0 | 1 | 0 | 1 | 0 | 2 |
| Lapinski J, 2016 <sup>101</sup>      | 1 | 1 | 0 | 0 | 0 | 2 |
| Levine RE, 2006 <sup>102</sup>       | 0 | 1 | 0 | 0 | 0 | 1 |
| Liao Y, 2010 <sup>103</sup>          | 0 | 1 | 0 | 1 | 1 | 3 |
| Ludwig AB, 2015 <sup>104</sup>       | 0 | 1 | 1 | 0 | 0 | 2 |
| Lupo 2011 <sup>105</sup>             | 0 | 0 | 0 | 0 | 1 | 1 |
| MacLean L, 2015 <sup>106</sup>       | 0 | 1 | 0 | 0 | 0 | 1 |
| Manaf NA, 2016 <sup>107</sup>        | 0 | 1 | 0 | 0 | 1 | 2 |
| Mancevska S, 2008 <sup>108</sup>     | 0 | 1 | 0 | 0 | 1 | 2 |
| Marakoğlu K, 2006 <sup>109</sup>     | 0 | 1 | 0 | 1 | 1 | 3 |
| Marwat MA, 2013 <sup>110</sup>       | 0 | 0 | 0 | 1 | 0 | 1 |
| Matheson KM, 2016 <sup>111</sup>     | 0 | 1 | 0 | 0 | 0 | 1 |
| Mayda AT, 2010 <sup>112</sup>        | 0 | 1 | 0 | 0 | 1 | 2 |
| Mehanna Z, 2006 <sup>113</sup>       | 0 | 1 | 0 | 0 | 0 | 1 |
| Melo-Carrillo A, 2012 <sup>114</sup> | 0 | 1 | 0 | 1 | 0 | 2 |
| Menezes RG, 2012 <sup>115</sup>      | 0 | 1 | 0 | 1 | 1 | 3 |
| Miletic V, 2015 <sup>116</sup>       | 0 | 1 | 0 | 1 | 1 | 3 |
| Mojs EH, 2015 <sup>117</sup>         | 1 | 1 | 0 | 0 | 0 | 2 |

|                                          |   |   |   |   |   |   |
|------------------------------------------|---|---|---|---|---|---|
| Mosley TH, 1994 <sup>118</sup>           | 0 | 0 | 0 | 1 | 0 | 1 |
| Mousa OY, 2016 <sup>119</sup>            | 0 | 1 | 0 | 0 | 0 | 1 |
| Naja WJ, 2016 <sup>120</sup>             | 0 | 1 | 0 | 1 | 0 | 2 |
| Nasioudis, D, 2015 <sup>121</sup>        | 0 | 0 | 0 | 0 | 1 | 1 |
| Nava FR, 2013 <sup>122</sup>             | 0 | 1 | 0 | 1 | 0 | 2 |
| Newbury-Birch D, 2001 <sup>123</sup>     | 0 | 0 | 0 | 1 | 0 | 1 |
| Okasha A, 1981 <sup>124</sup>            | 0 | 1 | 0 | 1 | 0 | 2 |
| Oku A, 2015 <sup>125</sup>               | 0 | 1 | 0 | 0 | 1 | 2 |
| Osama M, 2014 <sup>126</sup>             | 1 | 1 | 1 | 1 | 1 | 5 |
| Pan XF, 2015 <sup>127</sup>              | 1 | 1 | 0 | 0 | 1 | 3 |
| Paro HB, 2010 <sup>128</sup>             | 0 | 1 | 0 | 0 | 1 | 2 |
| Peleg-Sagy T, 2012 <sup>129</sup>        | 0 | 0 | 0 | 1 | 1 | 2 |
| Peleg-Sagy T, 2013 <sup>130</sup>        | 1 | 0 | 0 | 1 | 1 | 3 |
| Pereyra-Eliás R, 2010 <sup>131</sup>     | 0 | 1 | 0 | 0 | 1 | 2 |
| Perveen S, 2016 <sup>132</sup>           | 1 | 1 | 0 | 0 | 0 | 2 |
| Phillips LC, 2006 <sup>133</sup>         | 0 | 0 | 1 | 1 | 0 | 2 |
| Pickard M, 2000 <sup>134</sup>           | 0 | 0 | 0 | 1 | 0 | 1 |
| Pillay N, 2016 <sup>135</sup>            | 0 | 1 | 0 | 0 | 0 | 1 |
| Pinzón-Amado A, 2013 <sup>136</sup>      | 1 | 1 | 0 | 1 | 1 | 4 |
| Prinz P, 2012 <sup>137</sup>             | 0 | 0 | 0 | 0 | 0 | 0 |
| Quince TA, 2012 <sup>138</sup>           | 0 | 1 | 0 | 1 | 0 | 2 |
| Rab F, 2008 <sup>139</sup>               | 0 | 0 | 0 | 1 | 1 | 2 |
| Ristic-Ignjatovic D, 2013 <sup>140</sup> | 0 | 1 | 0 | 1 | 1 | 3 |
| Rizvi F, 2015 <sup>141</sup>             | 1 | 0 | 0 | 0 | 1 | 2 |
| Roh MS, 2009 <sup>142</sup>              | 1 | 1 | 0 | 0 | 0 | 2 |
| Romo-Nava F, 2016 <sup>143</sup>         | 0 | 1 | 0 | 1 | 1 | 3 |
| Rosal MC, 1997 <sup>144</sup>            | 0 | 0 | 0 | 0 | 0 | 0 |
| Saeed AA, 2016 <sup>145</sup>            | 0 | 0 | 0 | 0 | 1 | 1 |
| Samaranayake CB, 2011 <sup>146</sup>     | 0 | 1 | 0 | 1 | 0 | 2 |
| Saravanan C, 2014 <sup>147</sup>         | 0 | 1 | 0 | 0 | 0 | 1 |
| Schwenk TL, 2010 <sup>148</sup>          | 0 | 1 | 0 | 1 | 0 | 2 |
| Serra RD, 2015 <sup>149</sup>            | 0 | 1 | 0 | 1 | 0 | 2 |
| Seweryn M, 2015 <sup>150</sup>           | 1 | 1 | 0 | 1 | 0 | 3 |
| Shah AA, 2009 <sup>151</sup>             | 1 | 1 | 0 | 0 | 1 | 3 |
| Shariatpanaahi MV, 2007 <sup>152</sup>   | 0 | 0 | 0 | 1 | 1 | 2 |
| Shen L, 2009 <sup>153</sup>              | 0 | 1 | 0 | 0 | 0 | 1 |
| Sherina MS, 2004 <sup>154</sup>          | 0 | 1 | 1 | 0 | 1 | 3 |
| Shi M, 2015 <sup>155</sup>               | 1 | 1 | 0 | 1 | 1 | 4 |

|                                       |   |   |   |   |   |   |
|---------------------------------------|---|---|---|---|---|---|
| Shi M, 2016 <sup>156</sup>            | 1 | 1 | 0 | 1 | 1 | 4 |
| Shindel AW, 2011 <sup>157</sup>       | 1 | 1 | 0 | 1 | 1 | 4 |
| Sidana S, 2012 <sup>158</sup>         | 0 | 1 | 0 | 1 | 0 | 2 |
| Smith CK, 2007 <sup>159</sup>         | 0 | 1 | 0 | 1 | 1 | 3 |
| Smith JF, 2010 <sup>160</sup>         | 1 | 1 | 0 | 1 | 1 | 4 |
| Smith JF, 2011 <sup>161</sup>         | 1 | 1 | 0 | 1 | 0 | 3 |
| Sobowale K, 2014 <sup>162</sup>       | 0 | 1 | 1 | 1 | 0 | 3 |
| Sreeramareddy CT, 2007 <sup>163</sup> | 0 | 1 | 0 | 0 | 1 | 2 |
| Sun L, 2011 <sup>164</sup>            | 1 | 1 | 0 | 1 | 1 | 4 |
| Supe AN, 1998 <sup>165</sup>          | 0 | 1 | 0 | 0 | 0 | 1 |
| Tang QS, 2005 <sup>166</sup>          | 0 | 0 | 0 | 1 | 0 | 1 |
| Thomas MR, 2006 <sup>167</sup>        | 1 | 1 | 0 | 0 | 0 | 2 |
| Thompson D, 2010 <sup>168</sup>       | 0 | 0 | 0 | 1 | 0 | 1 |
| Thompson G, 2016 <sup>169</sup>       | 0 | 0 | 0 | 1 | 0 | 1 |
| Tin TS, 2015 <sup>170</sup>           | 0 | 1 | 0 | 1 | 0 | 2 |
| Tjia J, 2005 <sup>171</sup>           | 0 | 1 | 0 | 0 | 1 | 2 |
| Tran QA, 2015 <sup>172</sup>          | 1 | 1 | 1 | 1 | 0 | 4 |
| Tyssen R, 2001 <sup>173</sup>         | 0 | 1 | 0 | 1 | 1 | 3 |
| Valle R, 2013 <sup>174</sup>          | 0 | 1 | 0 | 1 | 1 | 3 |
| Vankar JR, 2014 <sup>175</sup>        | 0 | 1 | 0 | 1 | 0 | 2 |
| Vaysse B, 2014 <sup>176</sup>         | 0 | 0 | 1 | 1 | 1 | 3 |
| Vitaliano PP, 1988 <sup>177</sup>     | 0 | 1 | 0 | 0 | 1 | 2 |
| Voltmer E, 2012 <sup>178</sup>        | 0 | 0 | 0 | 0 | 1 | 1 |
| Walkiewicz M, 2012 <sup>179</sup>     | 0 | 0 | 0 | 0 | 0 | 0 |
| Wallin U, 2003 <sup>180</sup>         | 0 | 1 | 0 | 1 | 0 | 2 |
| Wan YH, 2012 <sup>181</sup>           | 1 | 1 | 1 | 1 | 1 | 5 |
| Waqas A, 2015 <sup>182</sup>          | 1 | 1 | 0 | 1 | 1 | 4 |
| Wege N, 2016 <sup>183</sup>           | 0 | 1 | 1 | 0 | 1 | 3 |
| Wimsatt LA, 2015 <sup>184</sup>       | 0 | 1 | 0 | 1 | 0 | 2 |
| Wolf MR, 2016 <sup>185</sup>          | 0 | 0 | 0 | 0 | 0 | 0 |
| Wongpakaran N, 2010 <sup>186</sup>    | 0 | 1 | 0 | 0 | 1 | 2 |
| Yang F, 2014 <sup>187</sup>           | 0 | 1 | 0 | 0 | 0 | 1 |
| Yilmaz Y, 2014 <sup>188</sup>         | 0 | 1 | 0 | 1 | 1 | 3 |
| Yoon S, 2014 <sup>189</sup>           | 0 | 0 | 0 | 1 | 1 | 2 |
| Youssef FF, 2016 <sup>190</sup>       | 0 | 1 | 0 | 1 | 1 | 3 |
| Yusoff MS, 2013 <sup>191</sup>        | 0 | 0 | 0 | 0 | 0 | 0 |
| Yusoff MS, 2013 <sup>192</sup>        | 0 | 0 | 1 | 0 | 0 | 1 |
| Zeldow PB, 1987 <sup>193</sup>        | 0 | 0 | 0 | 1 | 0 | 1 |
| Zoccolillo M, 1986 <sup>194</sup>     | 0 | 1 | 0 | 1 | 0 | 2 |
| Zulfikar Ali RV, 1994 <sup>195</sup>  | 0 | 1 | 0 | 1 | 0 | 2 |

Legend: Studies are ordered alphabetically by first author. Full details regarding Newcastle-Ottawa risk of bias scoring are provided in eMethods 2.

**eTable 3. Sensitivity analysis of the prevalence of depression or depressive symptoms among medical students. (Pages 10-16)**

| Study Omitted                           | Prevalence (%) | LCI   | UCI   | $\tau^2$ | $I^2$ |
|-----------------------------------------|----------------|-------|-------|----------|-------|
| Abdel Wahed WY, 2016 <sup>1</sup>       | 27.1%          | 24.6% | 29.7% | 0.77     | 98.9% |
| Adamiak G, 2004 <sup>2</sup>            | 27.3%          | 24.8% | 29.9% | 0.78     | 98.9% |
| Aghakhani N, 2011 <sup>3</sup>          | 27.1%          | 24.6% | 29.8% | 0.78     | 98.9% |
| Ahmed I, 2009 <sup>4</sup>              | 27.2%          | 24.7% | 29.9% | 0.78     | 98.9% |
| Akbari V, 2014 <sup>6</sup>             | 27.3%          | 24.8% | 30.0% | 0.77     | 98.9% |
| Aktekin M, 2001 <sup>7</sup>            | 27.1%          | 24.6% | 29.8% | 0.78     | 98.9% |
| Akvardar Y, 2003 <sup>8</sup>           | 27.2%          | 24.7% | 29.9% | 0.78     | 98.9% |
| Akvardar Y, 2004 <sup>9</sup>           | 27.2%          | 24.7% | 29.9% | 0.78     | 98.9% |
| Al Faris EA, 2012 <sup>10</sup>         | 27.1%          | 24.6% | 29.8% | 0.78     | 98.9% |
| Alexandrino-Silva C, 2009 <sup>12</sup> | 27.4%          | 24.9% | 30.0% | 0.77     | 98.9% |
| AlFaris EA, 2014 <sup>13</sup>          | 27.1%          | 24.6% | 29.7% | 0.77     | 98.9% |
| Ali FA, 2015 <sup>14</sup>              | 27.1%          | 24.6% | 29.7% | 0.77     | 98.9% |
| Alvi T, 2010 <sup>15</sup>              | 27.2%          | 24.7% | 29.9% | 0.78     | 98.9% |
| Amaral GF, 2008 <sup>16</sup>           | 27.2%          | 24.7% | 29.9% | 0.78     | 98.9% |
| Amir M, 2010 <sup>17</sup>              | 27.2%          | 24.7% | 29.9% | 0.78     | 98.9% |
| Angkurawaranon C, 2016 <sup>19</sup>    | 27.4%          | 24.9% | 30.0% | 0.77     | 98.9% |
| Aniebue PN, 2008 <sup>20</sup>          | 27.3%          | 24.8% | 29.9% | 0.78     | 98.9% |
| Ashor AW, 2012 <sup>21</sup>            | 27.3%          | 24.8% | 30.0% | 0.77     | 98.9% |
| Ashton CH, 1995 <sup>22</sup>           | 27.2%          | 24.7% | 29.8% | 0.78     | 98.9% |
| Aziz NAHA, 2011 <sup>23</sup>           | 27.2%          | 24.7% | 29.8% | 0.78     | 98.9% |
| Bahri Y, 2011 <sup>24</sup>             | 27.3%          | 24.8% | 29.9% | 0.78     | 98.9% |
| Baldassin S, 2008 <sup>25</sup>         | 27.2%          | 24.7% | 29.8% | 0.78     | 98.9% |
| Basnet B, 2012 <sup>26</sup>            | 27.2%          | 24.7% | 29.9% | 0.78     | 98.9% |
| Bassols AM, 2014 <sup>27</sup>          | 27.3%          | 24.8% | 30.0% | 0.78     | 98.9% |
| Bayati A, 2009 <sup>28</sup>            | 27.1%          | 24.6% | 29.8% | 0.78     | 98.9% |

|                                                 |       |       |       |      |       |
|-------------------------------------------------|-------|-------|-------|------|-------|
| Baykan Z, 2012 <sup>29</sup>                    | 27.2% | 24.7% | 29.9% | 0.78 | 98.9% |
| Berner JE, 2014 <sup>30</sup>                   | 27.3% | 24.8% | 29.9% | 0.78 | 98.9% |
| Bore M, 2016 <sup>31</sup>                      | 27.2% | 24.7% | 29.9% | 0.78 | 98.9% |
| Borst JM, 2015 <sup>32</sup>                    | 27.2% | 24.7% | 29.9% | 0.78 | 98.9% |
| Bunevicius A, 2008 <sup>33</sup>                | 27.3% | 24.8% | 30.0% | 0.77 | 98.9% |
| Camp DL, 1994 <sup>34</sup>                     | 27.3% | 24.8% | 30.0% | 0.78 | 98.9% |
| Carter FA, 2014 <sup>35</sup>                   | 27.3% | 24.8% | 30.0% | 0.77 | 98.9% |
| Castaldelli-Maia JM, 2012 <sup>36</sup>         | 27.3% | 24.8% | 30.0% | 0.77 | 98.9% |
| Chan DW, 1991 <sup>37</sup>                     | 27.1% | 24.6% | 29.8% | 0.78 | 98.9% |
| Chan DW, 1992 <sup>38</sup>                     | 27.3% | 24.8% | 30.0% | 0.78 | 98.9% |
| Chandavarkar U, 2007 <sup>39</sup>              | 27.5% | 24.9% | 30.1% | 0.77 | 98.9% |
| Chang E, 2012 <sup>40</sup>                     | 27.1% | 24.6% | 29.7% | 0.77 | 98.9% |
| Choi J, 2015 <sup>42</sup>                      | 27.3% | 24.8% | 29.9% | 0.78 | 98.9% |
| Clark DC, 1988 <sup>43</sup>                    | 27.2% | 24.7% | 29.8% | 0.78 | 98.9% |
| Costa EF, 2012 <sup>44</sup>                    | 27.2% | 24.7% | 29.8% | 0.78 | 98.9% |
| Dahlin M, 2005 <sup>45</sup>                    | 27.3% | 24.8% | 30.0% | 0.77 | 98.9% |
| Dahlin M, 2011 <sup>46</sup>                    | 27.4% | 24.9% | 30.0% | 0.77 | 98.9% |
| David MA, 2013 <sup>47</sup>                    | 27.3% | 24.8% | 30.0% | 0.77 | 98.9% |
| de Melo Cavestro J, 2006 <sup>48</sup>          | 27.4% | 24.9% | 30.0% | 0.77 | 98.9% |
| de Oliveira e Sousa Leão PB, 2011 <sup>49</sup> | 27.3% | 24.8% | 29.9% | 0.78 | 98.9% |
| De Sousa Lima L, 2010 <sup>50</sup>             | 27.1% | 24.6% | 29.8% | 0.78 | 98.9% |
| Del Ben CM, 2013 <sup>51</sup>                  | 27.3% | 24.8% | 30.0% | 0.78 | 98.9% |
| Dyrbye LN, 2006 <sup>52</sup>                   | 27.1% | 24.6% | 29.8% | 0.78 | 98.9% |
| Dyrbye LN, 2007 <sup>53</sup>                   | 27.1% | 24.6% | 29.8% | 0.78 | 98.9% |
| Dyrbye LN, 2008 <sup>54</sup>                   | 27.1% | 24.6% | 29.8% | 0.79 | 98.9% |
| Dyrbye LN, 2010 <sup>55</sup>                   | 27.1% | 24.6% | 29.8% | 0.78 | 98.9% |
| Dyrbye LN, 2011 <sup>56</sup>                   | 27.2% | 24.7% | 29.9% | 0.79 | 98.9% |



|                                       |       |       |       |      |       |
|---------------------------------------|-------|-------|-------|------|-------|
| Dyrbye LN, 2014 <sup>57</sup>         | 27.1% | 24.6% | 29.7% | 0.76 | 98.8% |
| Dyrbye LN, 2015 <sup>58</sup>         | 27.2% | 24.7% | 29.9% | 0.78 | 98.9% |
| El-Gilany AH, 2008 <sup>59</sup>      | 27.3% | 24.8% | 29.9% | 0.78 | 98.9% |
| Eller T, 2006 <sup>60</sup>           | 27.2% | 24.7% | 29.9% | 0.78 | 98.9% |
| Farahangiz S, 2016 <sup>62</sup>      | 27.1% | 24.6% | 29.8% | 0.78 | 98.9% |
| Ghudasara SL, 2011 <sup>63</sup>      | 27.3% | 24.8% | 29.9% | 0.78 | 98.9% |
| Givens JL, 2002 <sup>64</sup>         | 27.3% | 24.8% | 29.9% | 0.78 | 98.9% |
| Goebert D, 2009 <sup>65</sup>         | 27.3% | 24.8% | 29.9% | 0.78 | 98.9% |
| Gold JA, 2015 <sup>66</sup>           | 27.5% | 24.9% | 30.1% | 0.77 | 98.9% |
| Guerrero Lopez JB, 2013 <sup>67</sup> | 27.2% | 24.7% | 29.8% | 0.78 | 98.9% |
| Gulec M, 2005 <sup>68</sup>           | 27.2% | 24.7% | 29.9% | 0.78 | 98.9% |
| Gupta S, 2013 <sup>69</sup>           | 27.2% | 24.7% | 29.8% | 0.78 | 98.9% |
| Guthrie E, 1998 <sup>70</sup>         | 27.2% | 24.7% | 29.9% | 0.78 | 98.9% |
| Haglund ME, 2009 <sup>71</sup>        | 27.3% | 24.8% | 29.9% | 0.78 | 98.9% |
| Hardeman RR, 2015 <sup>72</sup>       | 27.4% | 24.9% | 30.0% | 0.75 | 98.9% |
| Helmets KF, 1997 <sup>73</sup>        | 27.1% | 24.6% | 29.7% | 0.77 | 98.9% |
| Hendryx MS, 1991 <sup>74</sup>        | 27.3% | 24.8% | 30.0% | 0.78 | 98.9% |
| Herzog DB, 1987 <sup>75</sup>         | 27.4% | 24.9% | 30.1% | 0.77 | 98.9% |
| Hirata FC, 2007 <sup>76</sup>         | 27.2% | 24.7% | 29.9% | 0.78 | 98.9% |
| Honney K, 2010 <sup>77</sup>          | 27.1% | 24.6% | 29.8% | 0.78 | 98.9% |
| Ibrahim MB, 2015 <sup>78</sup>        | 27.1% | 24.6% | 29.7% | 0.78 | 98.9% |
| Ibrahim N, 2013 <sup>79</sup>         | 27.3% | 24.8% | 30.0% | 0.77 | 98.9% |
| Ibrahim NK, 2013 <sup>80</sup>        | 27.3% | 24.8% | 30.0% | 0.77 | 98.9% |
| Imran N, 2016 <sup>81</sup>           | 27.1% | 24.6% | 29.8% | 0.78 | 98.9% |
| Inam SB, 2007 <sup>82</sup>           | 27.1% | 24.6% | 29.8% | 0.78 | 98.9% |
| Inam SN, 2003 <sup>83</sup>           | 27.1% | 24.6% | 29.7% | 0.77 | 98.9% |
| Iqbal S, 2015 <sup>84</sup>           | 27.1% | 24.6% | 29.8% | 0.78 | 98.9% |

|                                   |       |       |       |      |       |
|-----------------------------------|-------|-------|-------|------|-------|
| Jackson ER, 2016 <sup>85</sup>    | 27.1% | 24.6% | 29.7% | 0.76 | 98.8% |
| Jadoon NA, 2010 <sup>86</sup>     | 27.2% | 24.6% | 29.8% | 0.78 | 98.9% |
| James D, 2013 <sup>87</sup>       | 27.2% | 24.7% | 29.9% | 0.78 | 98.9% |
| Jeong Y, 2010 <sup>88</sup>       | 27.2% | 24.7% | 29.9% | 0.78 | 98.9% |
| Jurkat HB, 2011 <sup>89</sup>     | 27.3% | 24.8% | 30.0% | 0.78 | 98.9% |
| Karaoglu N, 2011 <sup>90</sup>    | 27.2% | 24.7% | 29.9% | 0.78 | 98.9% |
| Kaya M, 2007 <sup>91</sup>        | 27.3% | 24.8% | 29.9% | 0.78 | 98.9% |
| Khan MA, 2015 <sup>92</sup>       | 27.3% | 24.8% | 30.0% | 0.78 | 98.9% |
| Khan MS, 2006 <sup>93</sup>       | 27.0% | 24.6% | 29.7% | 0.77 | 98.9% |
| Kim B, 2014 <sup>95</sup>         | 27.2% | 24.7% | 29.9% | 0.78 | 98.9% |
| Kohls N, 2012 <sup>96</sup>       | 27.3% | 24.7% | 29.9% | 0.78 | 98.9% |
| Kongsomboon K, 2010 <sup>97</sup> | 27.4% | 24.9% | 30.1% | 0.77 | 98.9% |
| Kotter T, 2014 <sup>98</sup>      | 27.5% | 25.0% | 30.1% | 0.77 | 98.9% |
| Kulsoom B, 2015 <sup>99</sup>     | 27.2% | 24.7% | 29.8% | 0.78 | 98.9% |
| Kumar GS, 2012 <sup>100</sup>     | 27.0% | 24.6% | 29.7% | 0.77 | 98.9% |
| Lapinski J, 2016 <sup>101</sup>   | 27.2% | 24.6% | 29.8% | 0.79 | 98.9% |
| Levine RE, 2006 <sup>102</sup>    | 27.3% | 24.7% | 29.9% | 0.78 | 98.9% |
| Liao Y, 2010 <sup>103</sup>       | 27.4% | 24.9% | 30.1% | 0.77 | 98.9% |
| Ludwig AB, 2015 <sup>104</sup>    | 27.2% | 24.7% | 29.8% | 0.78 | 98.9% |
| Lupo 2011 <sup>105</sup>          | 27.3% | 24.7% | 29.9% | 0.78 | 98.9% |
| MacLean L, 2015 <sup>106</sup>    | 27.4% | 24.9% | 30.1% | 0.77 | 98.9% |
| Manaf NA, 2016 <sup>107</sup>     | 27.1% | 24.6% | 29.7% | 0.77 | 98.9% |
| Mancevska S, 2008 <sup>108</sup>  | 27.4% | 24.9% | 30.0% | 0.77 | 98.9% |
| Marakoğlu K, 2006 <sup>109</sup>  | 27.2% | 24.7% | 29.8% | 0.78 | 98.9% |
| Marwat MA, 2013 <sup>110</sup>    | 27.3% | 24.8% | 30.0% | 0.78 | 98.9% |
| Matheson KM, 2016 <sup>111</sup>  | 27.2% | 24.7% | 29.8% | 0.78 | 98.9% |
| Mayda AT, 2010 <sup>112</sup>     | 27.4% | 24.8% | 30.0% | 0.77 | 98.9% |

|                                          |       |       |       |      |       |
|------------------------------------------|-------|-------|-------|------|-------|
| Mehanna Z, 2006 <sup>113</sup>           | 27.2% | 24.7% | 29.9% | 0.78 | 98.9% |
| Melo-Carrillo A, 2012 <sup>114</sup>     | 27.2% | 24.7% | 29.8% | 0.78 | 98.9% |
| Miletic V, 2015 <sup>116</sup>           | 27.3% | 24.8% | 29.9% | 0.78 | 98.9% |
| Mojs EH, 2015 <sup>117</sup>             | 27.4% | 24.9% | 30.1% | 0.77 | 98.9% |
| Mosley TH, 1994 <sup>118</sup>           | 27.3% | 24.8% | 29.9% | 0.78 | 98.9% |
| Mousa OY, 2016 <sup>119</sup>            | 27.3% | 24.8% | 30.0% | 0.77 | 98.9% |
| Naja WJ, 2016 <sup>120</sup>             | 27.2% | 24.7% | 29.9% | 0.78 | 98.9% |
| Nasioudis, D, 2015 <sup>121</sup>        | 27.2% | 24.7% | 29.8% | 0.78 | 98.9% |
| Nava FR, 2013 <sup>122</sup>             | 27.5% | 25.0% | 30.1% | 0.76 | 98.9% |
| Newbury-Birch D, 2001 <sup>123</sup>     | 27.4% | 24.9% | 30.1% | 0.77 | 98.9% |
| Oku A, 2015 <sup>125</sup>               | 27.2% | 24.7% | 29.8% | 0.78 | 98.9% |
| Pan XF, 2015 <sup>127</sup>              | 27.3% | 24.8% | 30.0% | 0.78 | 98.9% |
| Paro HB, 2010 <sup>128</sup>             | 27.2% | 24.7% | 29.9% | 0.78 | 98.9% |
| Peleg-Sagy T, 2012 <sup>129</sup>        | 27.2% | 24.7% | 29.8% | 0.78 | 98.9% |
| Peleg-Sagy T, 2013 <sup>130</sup>        | 27.1% | 24.6% | 29.8% | 0.78 | 98.9% |
| Pereyra-Eliás R, 2010 <sup>131</sup>     | 27.2% | 24.7% | 29.9% | 0.78 | 98.9% |
| Perveen S, 2016 <sup>132</sup>           | 27.1% | 24.6% | 29.8% | 0.78 | 98.9% |
| Phillips LC, 2006 <sup>133</sup>         | 27.3% | 24.8% | 29.9% | 0.78 | 98.9% |
| Pickard M, 2000 <sup>134</sup>           | 27.4% | 24.9% | 30.0% | 0.77 | 98.9% |
| Pillay N, 2016 <sup>135</sup>            | 27.0% | 24.5% | 29.7% | 0.77 | 98.9% |
| Pinzón-Amado A, 2013 <sup>136</sup>      | 27.2% | 24.7% | 29.8% | 0.78 | 98.9% |
| Prinz P, 2012 <sup>137</sup>             | 27.4% | 24.9% | 30.1% | 0.77 | 98.9% |
| Quince TA, 2012 <sup>138</sup>           | 27.4% | 25.0% | 30.1% | 0.75 | 98.9% |
| Rab F, 2008 <sup>139</sup>               | 27.3% | 24.8% | 29.9% | 0.78 | 98.9% |
| Ristic-Ignjatovic D, 2013 <sup>140</sup> | 27.3% | 24.8% | 29.9% | 0.78 | 98.9% |
| Rizvi F, 2015 <sup>141</sup>             | 27.2% | 24.7% | 29.8% | 0.78 | 98.9% |
| Roh MS, 2009 <sup>142</sup>              | 27.4% | 25.0% | 30.0% | 0.72 | 98.8% |

|                                        |       |       |       |      |       |
|----------------------------------------|-------|-------|-------|------|-------|
| Romo-Nava F, 2016 <sup>143</sup>       | 27.3% | 24.8% | 30.0% | 0.77 | 98.9% |
| Rosal MC, 1997 <sup>144</sup>          | 27.2% | 24.7% | 29.8% | 0.78 | 98.9% |
| Saeed AA, 2016 <sup>145</sup>          | 27.1% | 24.6% | 29.7% | 0.77 | 98.9% |
| Samaranayake CB, 2011 <sup>146</sup>   | 27.3% | 24.8% | 30.0% | 0.78 | 98.9% |
| Saravanan C, 2014 <sup>147</sup>       | 27.2% | 24.7% | 29.9% | 0.78 | 98.9% |
| Schwenk TL, 2010 <sup>148</sup>        | 27.3% | 24.8% | 30.0% | 0.77 | 98.9% |
| Serra RD, 2015 <sup>149</sup>          | 27.2% | 24.7% | 29.9% | 0.78 | 98.9% |
| Seweryn M, 2015 <sup>150</sup>         | 27.2% | 24.6% | 29.8% | 0.79 | 98.9% |
| Shah AA, 2009 <sup>151</sup>           | 27.2% | 24.6% | 29.9% | 0.80 | 98.9% |
| Shariatpanaahi MV, 2007 <sup>152</sup> | 27.2% | 24.7% | 29.9% | 0.78 | 98.9% |
| Shen L, 2009 <sup>153</sup>            | 27.2% | 24.7% | 29.9% | 0.78 | 98.9% |
| Sherina MS, 2004 <sup>154</sup>        | 27.2% | 24.7% | 29.8% | 0.78 | 98.9% |
| Shi M, 2015 <sup>155</sup>             | 27.0% | 24.6% | 29.6% | 0.75 | 98.9% |
| Shi M, 2016 <sup>156</sup>             | 27.1% | 24.6% | 29.7% | 0.74 | 98.8% |
| Shindel AW, 2011 <sup>157</sup>        | 27.1% | 24.6% | 29.8% | 0.78 | 98.9% |
| Sidana S, 2012 <sup>158</sup>          | 27.3% | 24.8% | 29.9% | 0.78 | 98.9% |
| Smith CK, 2007 <sup>159</sup>          | 27.4% | 24.9% | 30.1% | 0.77 | 98.9% |
| Smith JF, 2010 <sup>160</sup>          | 27.2% | 24.7% | 29.9% | 0.78 | 98.9% |
| Smith JF, 2011 <sup>161</sup>          | 27.2% | 24.7% | 29.9% | 0.78 | 98.9% |
| Sobowale K, 2014 <sup>162</sup>        | 27.3% | 24.8% | 30.0% | 0.77 | 98.9% |
| Sreeramareddy CT, 2007 <sup>163</sup>  | 27.3% | 24.8% | 29.9% | 0.78 | 98.9% |
| Sun L, 2011 <sup>164</sup>             | 27.3% | 24.8% | 30.0% | 0.76 | 98.8% |
| Supe AN, 1998 <sup>165</sup>           | 27.0% | 24.5% | 29.7% | 0.77 | 98.9% |
| Tang QS, 2005 <sup>166</sup>           | 27.2% | 24.7% | 29.9% | 0.78 | 98.9% |
| Thomas MR, 2006 <sup>167</sup>         | 27.1% | 24.6% | 29.8% | 0.78 | 98.9% |
| Thompson D, 2010 <sup>168</sup>        | 27.1% | 24.6% | 29.8% | 0.78 | 98.9% |
| Thompson G, 2016 <sup>169</sup>        | 27.3% | 24.8% | 30.0% | 0.78 | 98.9% |

|                                      |       |       |       |      |       |
|--------------------------------------|-------|-------|-------|------|-------|
| Tin TS, 2015 <sup>170</sup>          | 27.4% | 24.9% | 30.1% | 0.77 | 98.9% |
| Tjia J, 2005 <sup>171</sup>          | 27.3% | 24.8% | 30.0% | 0.77 | 98.9% |
| Valle R, 2013 <sup>174</sup>         | 27.3% | 24.8% | 29.9% | 0.78 | 98.9% |
| Vankar JR, 2014 <sup>175</sup>       | 27.2% | 24.7% | 29.9% | 0.78 | 98.9% |
| Vaysse B, 2014 <sup>176</sup>        | 27.5% | 24.9% | 30.1% | 0.77 | 98.9% |
| Vitaliano PP, 1988 <sup>177</sup>    | 27.3% | 24.7% | 29.9% | 0.78 | 98.9% |
| Voltmer E, 2012 <sup>178</sup>       | 27.5% | 25.0% | 30.1% | 0.77 | 98.9% |
| Walkiewicz M, 2012 <sup>179</sup>    | 27.3% | 24.8% | 30.0% | 0.78 | 98.9% |
| Wan YH, 2012 <sup>181</sup>          | 27.1% | 24.6% | 29.8% | 0.80 | 98.9% |
| Waqas A, 2015 <sup>182</sup>         | 27.2% | 24.7% | 29.9% | 0.78 | 98.9% |
| Wege N, 2016 <sup>183</sup>          | 27.4% | 24.9% | 30.0% | 0.77 | 98.9% |
| Wimsatt LA, 2015 <sup>184</sup>      | 27.3% | 24.8% | 30.0% | 0.77 | 98.9% |
| Wolf MR, 2016 <sup>185</sup>         | 27.4% | 24.9% | 30.0% | 0.77 | 98.9% |
| Wongpakaran N, 2010 <sup>186</sup>   | 27.4% | 24.9% | 30.1% | 0.77 | 98.9% |
| Yang F, 2014 <sup>187</sup>          | 27.5% | 25.0% | 30.2% | 0.76 | 98.9% |
| Yilmaz Y, 2014 <sup>188</sup>        | 27.2% | 24.7% | 29.9% | 0.78 | 98.9% |
| Yoon S, 2014 <sup>189</sup>          | 27.3% | 24.8% | 30.0% | 0.77 | 98.9% |
| Youssef FF, 2016 <sup>190</sup>      | 27.2% | 24.7% | 29.8% | 0.78 | 98.9% |
| Yusoff MS, 2013 <sup>191</sup>       | 27.2% | 24.7% | 29.8% | 0.78 | 98.9% |
| Yusoff MS, 2013 <sup>192</sup>       | 27.2% | 24.7% | 29.9% | 0.78 | 98.9% |
| Zeldow PB, 1987 <sup>193</sup>       | 27.3% | 24.8% | 30.0% | 0.78 | 98.9% |
| Zoccolillo M, 1986 <sup>194</sup>    | 27.3% | 24.8% | 29.9% | 0.78 | 98.9% |
| Zulfikar Ali RV, 1994 <sup>195</sup> | 27.3% | 24.8% | 29.9% | 0.78 | 98.9% |
| <b>Pooled estimate</b>               | 27.2% | 24.7% | 29.9% | 0.78 | 98.9% |

Legend: Studies are ordered alphabetically by first author. Summary estimates were calculated omitting one study at a time using a random effects model.

**eTable 4. Within-instrument heterogeneity analyses of studies reporting on the prevalence of depression or depressive symptoms among medical students. (Pages 17-19)**

| Stratified Meta-Analyses             |                      |             |            |       |       |        |      |                |                  | Meta-regression Analyses |                     |       |       |       |       |        |         |         |     |
|--------------------------------------|----------------------|-------------|------------|-------|-------|--------|------|----------------|------------------|--------------------------|---------------------|-------|-------|-------|-------|--------|---------|---------|-----|
| Beck Depression Inventory (BDI), ≥10 |                      | No. Studies | Prevalence | LCI   | UCI   | Q      | t    | I <sup>2</sup> | P for difference | Q (diff)                 | Slope               | SE    | Z     | P     | LCI   | UCI    | P (mod) | Q (mod) |     |
|                                      | Cross-sectional      | 23          | 33.0%      | 26.2% | 40.6% | 16.619 | 0.76 | 98%            | 0.02             | 5.4                      | Survey Year         | 0.09% | 0.3%  | 2.85  | 0.005 | 0.3%   | 1.5%    | 0.005   | 7.9 |
|                                      | Longitudinal         | 1           | 18.8%      | 11.9% | 28.5% | 0.0    | --   | --             |                  |                          | Age                 | -2.6% | 2.0%  | -0.33 | 0.00  | -6.6%  | 1.4%    | 0.20    | 1.6 |
|                                      |                      |             |            |       |       |        |      |                |                  |                          | Proportion of Males | 4.9%  | 16.1% | 0.33  | 0.076 | -26.7% | 36.5%   | 0.76    | 0.1 |
|                                      | United States        | 4           | 13.0%      | 7.0%  | 22.8% | 37.8   | 0.44 | 92%            | 0.004            | 1.27                     |                     |       |       |       |       |        |         |         |     |
|                                      | Not United States    | 20          | 37.5%      | 29.8% | 45.9% | 15.490 | 0.86 | 98%            |                  |                          |                     |       |       |       |       |        |         |         |     |
|                                      |                      |             |            |       |       |        |      |                |                  |                          |                     |       |       |       |       |        |         |         |     |
|                                      | Preclinical students | 8           | 24.0%      | 15%   | 34%   | 22     | 0    | 96%            | 0.3              | 1.                       |                     |       |       |       |       |        |         |         |     |

|  |                                                    |                     |                   |             |             |          |                          |                      |                         |                       |        |                     |           |          |          |             |             |                |                |           |
|--|----------------------------------------------------|---------------------|-------------------|-------------|-------------|----------|--------------------------|----------------------|-------------------------|-----------------------|--------|---------------------|-----------|----------|----------|-------------|-------------|----------------|----------------|-----------|
|  | only                                               |                     | %                 | .8<br>%     | .6<br>%     | 0.7      | .5                       | .8<br>%              |                         | <i>I</i> <sup>*</sup> | 1<br>* |                     |           |          |          |             |             |                |                |           |
|  | Both                                               | 12                  | 41.8<br>%         | 35.8<br>%   | 48.1<br>%   | 26.5     | 0.6                      | 95.9<br>%            |                         |                       |        |                     |           |          |          |             |             |                |                |           |
|  | Clinical students only                             | 3                   | 31.7<br>%         | 21.6<br>%   | 43.9<br>%   | 19.0     | 0.2                      | 89.5<br>%            |                         |                       |        |                     |           |          |          |             |             |                |                |           |
|  |                                                    |                     |                   |             |             |          |                          |                      |                         |                       |        |                     |           |          |          |             |             |                |                |           |
|  | NOS <3                                             | 13                  | 34.6<br>%         | 26.5<br>%   | 43.6<br>%   | 26.1     | 0.5                      | 95.4<br>%            |                         | 0.5                   | 0.5    |                     |           |          |          |             |             |                |                |           |
|  | NOS ≥3                                             | 11                  | 30.0<br>%         | 20.8<br>%   | 41.0<br>%   | 12.8     | 0.7                      | 99.2<br>%            |                         |                       |        |                     |           |          |          |             |             |                |                |           |
|  |                                                    |                     |                   |             |             |          |                          |                      |                         |                       |        |                     |           |          |          |             |             |                |                |           |
|  | <b>Patient Health Questionnaire-9 (PHQ-9), ≥10</b> | <b>No . Studies</b> | <b>Prevalence</b> | <b>L CI</b> | <b>U CI</b> | <b>Q</b> | <b>t a u<sup>2</sup></b> | <b>I<sup>2</sup></b> | <b>P for difference</b> | <b>Q (diff)</b>       |        | <b>Sl ope</b>       | <b>SE</b> | <b>Z</b> | <b>P</b> | <b>L CI</b> | <b>U CI</b> | <b>P (mod)</b> | <b>Q (mod)</b> |           |
|  | Cross-sectional                                    | 15                  | 18.3<br>%         | 12.8<br>%   | 25.4<br>%   | 69.3     | 0.7                      | 98.0<br>%            | --                      | --                    |        | Survey Year         | -0.6<br>% | 1.9<br>% | -0.7     | 0.7<br>%    | -3.1<br>%   | 0.7<br>%       | 0.1            |           |
|  | Longitudinal                                       | --                  | --                | --          | --          | --       | --                       | --                   |                         |                       |        | Age                 | 0.3<br>%  | 4.9<br>% | 0.1      | 0.9<br>%    | -9.4<br>%   | 9.9<br>%       | 0.9<br>%       | 0.0<br>03 |
|  |                                                    |                     |                   |             |             |          |                          |                      |                         |                       |        | Proportion of Males | -28       | 25.0     | -1       | 0.2<br>77.  | -20.2       | 0.2<br>5       | 1.3            |           |

|  |                                                                       |                              |                             |                      |                      |               |                            |                      |                                           |                                |         |                        |           |          |          |                 |                 |                         |                         |
|--|-----------------------------------------------------------------------|------------------------------|-----------------------------|----------------------|----------------------|---------------|----------------------------|----------------------|-------------------------------------------|--------------------------------|---------|------------------------|-----------|----------|----------|-----------------|-----------------|-------------------------|-------------------------|
|  |                                                                       |                              |                             |                      |                      |               |                            |                      |                                           |                                |         | .8<br>%                | %         | .<br>2   | 5        | 8<br>%          | %               |                         |                         |
|  | United States                                                         | 3                            | 14.7<br>%                   | 12<br>.7<br>%        | 16<br>.8<br>%        | 0.<br>8       | 0                          | 0                    | 0                                         | 0.2<br>3                       | 1.<br>4 |                        |           |          |          |                 |                 |                         |                         |
|  | Not United States                                                     | 12                           | 19.1<br>%                   | 12<br>.6<br>%        | 28<br>.0<br>%        | 65<br>9.<br>7 | 0                          | 98                   |                                           |                                |         |                        |           |          |          |                 |                 |                         |                         |
|  |                                                                       |                              |                             |                      |                      |               |                            |                      |                                           |                                |         |                        |           |          |          |                 |                 |                         |                         |
|  | Preclinical students<br>only                                          | 3                            | 21.3<br>%                   | 9.<br>8<br>%         | 40<br>.4<br>%        | 65<br>.6      | 0                          | 96                   | 0.4<br>6                                  | 0.<br>5                        |         |                        |           |          |          |                 |                 |                         |                         |
|  | Both                                                                  | 11                           | 15.6<br>%                   | 11<br>.0<br>%        | 21<br>.8<br>%        | 33<br>5.<br>4 | 0                          | 97                   |                                           |                                |         |                        |           |          |          |                 |                 |                         |                         |
|  | Clinical students only                                                | --                           | --                          | --                   | --                   | --            | --                         | --                   |                                           |                                |         |                        |           |          |          |                 |                 |                         |                         |
|  |                                                                       |                              |                             |                      |                      |               |                            |                      |                                           |                                |         |                        |           |          |          |                 |                 |                         |                         |
|  | NOS <3                                                                | 10                           | 15.1<br>%                   | 9.<br>6<br>%         | 23<br>.1<br>%        | 30<br>4.<br>3 | 0                          | 97                   | 0.1<br>1                                  | 2.<br>5                        |         |                        |           |          |          |                 |                 |                         |                         |
|  | NOS ≥3                                                                | 5                            | 25.8<br>%                   | 15<br>.5<br>%        | 39<br>.7<br>%        | 25<br>4.<br>4 | 0                          | 98                   |                                           |                                |         |                        |           |          |          |                 |                 |                         |                         |
|  |                                                                       |                              |                             |                      |                      |               |                            |                      |                                           |                                |         |                        |           |          |          |                 |                 |                         |                         |
|  | <b>Primary Care Evaluation<br/>of Mental Disorders<br/>(PRIME-MD)</b> | <b>No<br/>. St<br/>udies</b> | <b>Pre<br/>val<br/>ence</b> | <b>L<br/>C<br/>I</b> | <b>U<br/>C<br/>I</b> | <b>Q</b>      | <b>t<br/>a<br/>u<br/>2</b> | <b>I<sup>2</sup></b> | <b>P<br/>for<br/>diff<br/>er<br/>ence</b> | <b>Q<br/>(d<br/>iff<br/>f)</b> |         | <b>Sl<br/>o<br/>pe</b> | <b>SE</b> | <b>Z</b> | <b>P</b> | <b>L<br/>CI</b> | <b>U<br/>CI</b> | <b>P<br/>(m<br/>od)</b> | <b>Q<br/>(m<br/>od)</b> |
|  | Cross-sectional                                                       | 14                           | 37.5                        | 32                   | 43                   | 79            | 0                          | 98                   | --                                        | --                             | Survey  | -                      | 1.5       | -        | 0.       | -               | -               | 0.0                     | 4.0                     |



|  |                                 |           |            |          |          |          |          |                      |  |          |          |                        |           |           |          |          |          |          |          |          |
|--|---------------------------------|-----------|------------|----------|----------|----------|----------|----------------------|--|----------|----------|------------------------|-----------|-----------|----------|----------|----------|----------|----------|----------|
|  |                                 |           | %          | .0       | .3       | 8.       | .        | .4                   |  |          |          | Year                   | 2.        | %         | 2        | 0        | 5.8      | 0.1      | 5        |          |
|  |                                 |           | %          | %        | %        | 6        | 2        | %                    |  |          |          |                        | 9         |           | 0        | 5        | %        | %        |          |          |
|  | Longitudinal                    | --        | --         | --       | --       | --       | --       | --                   |  |          |          | Age                    | --        | --        | -        | --       | --       | --       | --       | --       |
|  |                                 |           |            |          |          |          |          |                      |  |          |          | Proportion<br>of Males | 45        | 17        | 0        | 0.       | -        | 39       | 0.8      | 0.1      |
|  |                                 |           |            |          |          |          |          |                      |  |          |          | .2                     | 7.6       | .         | 8        | 30       | 3.3      | 0        |          |          |
|  |                                 |           |            |          |          |          |          |                      |  |          |          | %                      | %         | 3         | 0        | 3.0      | %        |          |          |          |
|  | United States                   | 14        | 37.5       | 32       | 43       | 79       | 0        | 98                   |  | --       | --       |                        |           |           |          |          |          |          |          |          |
|  |                                 |           | %          | .0       | .3       | 8.       | .        | .4                   |  |          |          |                        |           |           |          |          |          |          |          |          |
|  |                                 |           | %          | %        | %        | 6        | 2        | %                    |  |          |          |                        |           |           |          |          |          |          |          |          |
|  | Not United States               | --        | --         | --       | --       | --       | --       | --                   |  |          |          |                        |           |           |          |          |          |          |          |          |
|  |                                 |           |            |          |          |          |          |                      |  |          |          |                        |           |           |          |          |          |          |          |          |
|  | Preclinical students<br>only    | --        | --         | --       | --       | --       | --       | --                   |  | 0.9      | 0.       |                        |           |           |          |          |          |          |          |          |
|  |                                 |           |            |          |          |          |          |                      |  | 2        | 0        |                        |           |           |          |          |          |          |          |          |
|  |                                 |           |            |          |          |          |          |                      |  | 1        | 1        |                        |           |           |          |          |          |          |          |          |
|  | Both                            | 13        | 37.6       | 32       | 43       | 68       | 0        | 98                   |  |          |          |                        |           |           |          |          |          |          |          |          |
|  |                                 |           | %          | .0       | .5       | 8.       | .        | .3                   |  |          |          |                        |           |           |          |          |          |          |          |          |
|  |                                 |           | %          | %        | %        | 0        | 2        | %                    |  |          |          |                        |           |           |          |          |          |          |          |          |
|  | Clinical students only          | 1         | 37.9       | 35       | 40       | 0        | --       | --                   |  |          |          |                        |           |           |          |          |          |          |          |          |
|  |                                 |           | %          | .4       | .4       |          |          |                      |  |          |          |                        |           |           |          |          |          |          |          |          |
|  |                                 |           | %          | %        | %        |          |          |                      |  |          |          |                        |           |           |          |          |          |          |          |          |
|  | NOS <3                          | 14        | 37.5       | 32       | 43       | 79       | 0        | 98                   |  | --       | --       |                        |           |           |          |          |          |          |          |          |
|  |                                 |           | %          | .0       | .3       | 8.       | .        | .4                   |  |          |          |                        |           |           |          |          |          |          |          |          |
|  |                                 |           | %          | %        | %        | 6        | 2        | %                    |  |          |          |                        |           |           |          |          |          |          |          |          |
|  | NOS ≥3                          | --        | --         | --       | --       | --       | --       | --                   |  |          |          |                        |           |           |          |          |          |          |          |          |
|  |                                 |           |            |          |          |          |          |                      |  |          |          |                        |           |           |          |          |          |          |          |          |
|  | <b>Center for Epidemiologic</b> | <b>No</b> | <b>Pre</b> | <b>L</b> | <b>U</b> | <b>Q</b> | <b>t</b> | <b>I<sup>2</sup></b> |  | <b>P</b> | <b>Q</b> |                        | <b>SI</b> | <b>SE</b> | <b>Z</b> | <b>P</b> | <b>L</b> | <b>U</b> | <b>P</b> | <b>Q</b> |

| Studies Depression Scale (CES-D), ≥16 |                           | . Studies | Prevalence | CI    | CI    |       | Number |       | for difference | (diff) |  | Open                |        |       | CI    | CI   | (mod)  | (mod) |      |     |
|---------------------------------------|---------------------------|-----------|------------|-------|-------|-------|--------|-------|----------------|--------|--|---------------------|--------|-------|-------|------|--------|-------|------|-----|
|                                       | Cross-sectional           | 12        | 42.4%      | 31.8% | 53.8% | 11.6% | 0.6    | 99.1% | 0.42           | 0.7    |  | Survey Year         | 1.9%   | 0.7%  | 2.7   | 0.01 | 0.5%   | 3.2%  | 0.01 | 7.5 |
|                                       | Longitudinal              | 1         | 47.9%      | 40.9% | 55.0% | 0     | --     | --    |                |        |  | Age                 | -1.7%  | 1.6%  | -0.1  | 0.29 | -4.9%  | 1.4%  | 0.29 | 1.1 |
|                                       |                           |           |            |       |       |       |        |       |                |        |  | Proportion of Males | -16.0% | 11.8% | -0.14 | 0.17 | -39.0% | 7.1%  | 0.17 | 1.8 |
|                                       | United States             | 6         | 34.4%      | 25.1% | 45.1% | 17.2% | 0.3    | 97.2% | 0.05           | 3.8    |  |                     |        |       |       |      |        |       |      |     |
|                                       | Not United States         | 7         | 50.3%      | 38.4% | 62.0% | 40.8% | 0.4    | 98.4% |                |        |  |                     |        |       |       |      |        |       |      |     |
|                                       |                           |           |            |       |       |       |        |       |                |        |  |                     |        |       |       |      |        |       |      |     |
|                                       | Preclinical students only | 2         | 39.0%      | 35.0% | 43.1% | 0.2   | 0      | 0%    | 0.97*          | 0*     |  |                     |        |       |       |      |        |       |      |     |
|                                       | Both                      | 9         | 44.5%      | 32.1% | 57.6% | 11.6% | 0.6    | 99.6% |                |        |  |                     |        |       |       |      |        |       |      |     |
|                                       | Clinical students only    | 2         | 39.7%      | 12.4% | 75.3% | 14.0% | 1      | 92.8% |                |        |  |                     |        |       |       |      |        |       |      |     |

|  |                                                           |                     | %                 | %             |               | 1              | %            |                      |                         |                 |                        |                   |               |              |              |                    |               |                |                |
|--|-----------------------------------------------------------|---------------------|-------------------|---------------|---------------|----------------|--------------|----------------------|-------------------------|-----------------|------------------------|-------------------|---------------|--------------|--------------|--------------------|---------------|----------------|----------------|
|  | NOS <3                                                    | 4                   | 40.6<br>%         | 27<br>.5<br>% | 55<br>.2<br>% | 15<br>.5<br>%  | 0<br>.3<br>% | 80<br>.6<br>%        |                         | 0.7<br>5        | 0.<br>1                |                   |               |              |              |                    |               |                |                |
|  | NOS ≥3                                                    | 9                   | 43.7<br>%         | 31<br>.7<br>% | 56<br>.5<br>% | 11<br>37<br>.9 | 0<br>.6<br>% | 99<br>.3<br>%        |                         |                 |                        |                   |               |              |              |                    |               |                |                |
|  |                                                           |                     |                   |               |               |                |              |                      |                         |                 |                        |                   |               |              |              |                    |               |                |                |
|  | <b>Hospital Anxiety and Depression Scale (HADS-D), ≥8</b> | <b>No . Studies</b> | <b>Prevalence</b> | <b>LCI</b>    | <b>UCI</b>    | <b>Q</b>       | <b>t</b>     | <b>I<sup>2</sup></b> | <b>P for difference</b> | <b>Q (diff)</b> |                        | <b>Slope</b>      | <b>SE</b>     | <b>Z</b>     | <b>P</b>     | <b>LCI</b>         | <b>UCI</b>    | <b>P (mod)</b> | <b>Q (mod)</b> |
|  | Cross-sectional                                           | 10                  | 16.4<br>%         | 11<br>.2<br>% | 23<br>.4<br>% | 15<br>7.<br>6  | 0<br>.5<br>% | 94<br>.3<br>%        | <0.<br>000<br>1         | 1<br>8.<br>5    | Survey<br>Year         | -<br>0.<br>3<br>% | 0.6<br>%      | -<br>0<br>.5 | 0.<br>6<br>0 | -<br>1.4<br>%      | 0.8<br>%      | 0.6<br>0       | 0.3            |
|  | Longitudinal                                              | 2                   | 6.5<br>%          | 5.<br>6<br>%  | 7.<br>6<br>%  | 0.<br>9        | 0<br>.0      | 0<br>%               |                         |                 | Age                    | -<br>4.<br>3<br>% | 7.7<br>%      | -<br>0<br>.6 | 0.<br>5<br>8 | -<br>19.<br>5<br>% | 10.<br>8<br>% | 0.5<br>8       | 0.3            |
|  |                                                           |                     |                   |               |               |                |              |                      |                         |                 | Proportion<br>of Males | 14<br>.4<br>%     | 25.<br>1<br>% | 0<br>.5<br>6 | 0.<br>7      | -<br>34.<br>8<br>% | 63.<br>6<br>% | 0.5<br>7       | 0.3            |
|  | United States                                             | --                  | --                | --            | --            | --             | --           | --                   | --                      | --              |                        |                   |               |              |              |                    |               |                |                |
|  | Not United States                                         | 12                  | 13.6<br>%         | 8.<br>4<br>%  | 21<br>.3<br>% | 38<br>9.<br>1  | 0<br>.8<br>% | 97<br>.2<br>%        |                         |                 |                        |                   |               |              |              |                    |               |                |                |

|  |                                                          |                     |                   |              |              |          |                          |                      |                         |                 |             |               |           |          |          |             |             |                |                |
|--|----------------------------------------------------------|---------------------|-------------------|--------------|--------------|----------|--------------------------|----------------------|-------------------------|-----------------|-------------|---------------|-----------|----------|----------|-------------|-------------|----------------|----------------|
|  |                                                          |                     |                   |              |              |          |                          |                      |                         |                 |             |               |           |          |          |             |             |                |                |
|  | Preclinical students only                                | 6                   | 10.7 %            | 4.4 %        | 23.8 %       | 29.5 %   | 1.4 %                    | 98.3 %               | 0.84*                   | 0.04*           |             |               |           |          |          |             |             |                |                |
|  | Both                                                     | 3                   | 27.3 %            | 23.3 %       | 31.6 %       | 3.2 %    | 0.0 %                    | 36.9 %               |                         |                 |             |               |           |          |          |             |             |                |                |
|  | Clinical students only                                   | 2                   | 9.1 %             | 2.4 %        | 29.1 %       | 7.6 %    | 0.9 %                    | 86.9 %               |                         |                 |             |               |           |          |          |             |             |                |                |
|  |                                                          |                     |                   |              |              |          |                          |                      |                         |                 |             |               |           |          |          |             |             |                |                |
|  | NOS <3                                                   | 5                   | 10.2 %            | 5.9 %        | 17.0 %       | 32.5 %   | 0.4 %                    | 87.7 %               | 0.14                    | 2.2             |             |               |           |          |          |             |             |                |                |
|  | NOS ≥3                                                   | 7                   | 17.1 %            | 10.8 %       | 26.0 %       | 13.9 %   | 0.5 %                    | 95.6 %               |                         |                 |             |               |           |          |          |             |             |                |                |
|  |                                                          |                     |                   |              |              |          |                          |                      |                         |                 |             |               |           |          |          |             |             |                |                |
|  | <b>Zung Self-Rating Depression Scale (Zung-SDS), ≥50</b> | <b>No . Studies</b> | <b>Prevalence</b> | <b>L C I</b> | <b>U C I</b> | <b>Q</b> | <b>t a u<sup>2</sup></b> | <b>I<sup>2</sup></b> | <b>P for difference</b> | <b>Q (diff)</b> |             | <b>Sl ope</b> | <b>SE</b> | <b>Z</b> | <b>P</b> | <b>L CI</b> | <b>U CI</b> | <b>P (mod)</b> | <b>Q (mod)</b> |
|  | Cross-sectional                                          | 10                  | 21.7 %            | 13.7 %       | 32.5 %       | 45.3 %   | 0.8 %                    | 98.0 %               | 0.49                    | 0.05            | Survey Year | 0.3 %         | 0.6 %     | 0.4      | 0.6      | -1.0 %      | 1.5 %       | 0.68           | 0.2            |
|  | Longitudinal                                             | 1                   | 18.1 %            | 13.7 %       | 23.6 %       | 0        | --                       | --                   |                         |                 | Age         | 2.1 %         | 3.5 %     | 0.6      | 0.5      | -4.8 %      | 9.0 %       | 0.55           | 0.36           |

|                                                 |                      |                             |                      |                      |               |          |                      |                                   |                                |              | Proportion<br>of Males | -<br>8.<br>1<br>% | 20.<br>0<br>% | -<br>0<br>.4 | 0.<br>6<br>9    | -<br>47.<br>3<br>% | 31.<br>2<br>%           | 0.6<br>9                | 0.1<br>6 |
|-------------------------------------------------|----------------------|-----------------------------|----------------------|----------------------|---------------|----------|----------------------|-----------------------------------|--------------------------------|--------------|------------------------|-------------------|---------------|--------------|-----------------|--------------------|-------------------------|-------------------------|----------|
| United States                                   | 1                    | 18.1<br>%                   | 13<br>.7<br>%        | 23<br>.6<br>%        | 0             | --       | --                   |                                   | 0.4<br>9                       | 0.<br>5      |                        |                   |               |              |                 |                    |                         |                         |          |
| Not United States                               | 10                   | 21.7<br>%                   | 13<br>.7<br>%        | 32<br>.5<br>%        | 45<br>7.<br>3 | 0        | 98<br>.0<br>%        |                                   |                                |              |                        |                   |               |              |                 |                    |                         |                         |          |
| Preclinical students<br>only                    | 5                    | 18.3<br>%                   | 9.<br>7<br>%         | 32<br>.0<br>%        | 73<br>.5      | 0        | 94<br>.6<br>7<br>%   |                                   | 0.5<br>0                       | 0.<br>5      |                        |                   |               |              |                 |                    |                         |                         |          |
| Both                                            | 5                    | 24.2<br>%                   | 13<br>.4<br>%        | 39<br>.8<br>%        | 23<br>8.<br>3 | 0        | 98<br>.3<br>7<br>%   |                                   |                                |              |                        |                   |               |              |                 |                    |                         |                         |          |
| Clinical students only                          | --                   | --                          | --                   | --                   | --            | --       | --                   |                                   |                                |              |                        |                   |               |              |                 |                    |                         |                         |          |
| NOS <3                                          | 7                    | 21.6<br>%                   | 16<br>.7<br>%        | 27<br>.5<br>%        | 30<br>.3      | 0        | 80<br>.2<br>1<br>%   |                                   | 0.9<br>3                       | 0.<br>0<br>1 |                        |                   |               |              |                 |                    |                         |                         |          |
| NOS ≥3                                          | 4                    | 20.8<br>%                   | 9.<br>1<br>%         | 40<br>.8<br>%        | 30<br>9.<br>3 | 1        | 99<br>.0<br>%        |                                   |                                |              |                        |                   |               |              |                 |                    |                         |                         |          |
| <b>Beck Depression Inventory<br/>(BDI), ≥17</b> | <b>No<br/>. Stud</b> | <b>Pre<br/>va<br/>lence</b> | <b>L<br/>C<br/>I</b> | <b>U<br/>C<br/>I</b> | <b>Q</b>      | <b>t</b> | <b>I<sup>2</sup></b> | <b>P<br/>for<br/>diff<br/>ere</b> | <b>Q<br/>(d<br/>iff<br/>f)</b> |              | <b>Sl<br/>o<br/>pe</b> | <b>SE</b>         | <b>Z</b>      | <b>P</b>     | <b>L<br/>CI</b> | <b>U<br/>CI</b>    | <b>P<br/>(m<br/>od)</b> | <b>Q<br/>(m<br/>od)</b> |          |

|                              | ies |           |               |               |               |              |               |  | nce      |    |                        |                   |               |              |                     |               |                |          |          |
|------------------------------|-----|-----------|---------------|---------------|---------------|--------------|---------------|--|----------|----|------------------------|-------------------|---------------|--------------|---------------------|---------------|----------------|----------|----------|
| Cross-sectional              | 6   | 21.7<br>% | 12<br>.0<br>% | 36<br>.0<br>% | 17<br>3.<br>5 | 0<br>.1<br>8 | 97<br>.1<br>% |  | --       | -- | Survey<br>Year         | -<br>0.<br>1<br>% | 1.5<br>%      | -<br>0<br>.1 | 0.<br>9<br>3        | -<br>3.0<br>% | 2.8<br>%       | 0.9<br>3 | 0.0<br>1 |
| Longitudinal                 | --  | --        | --            | --            | --            | --           | --            |  |          |    | Age                    | 5.<br>1<br>%      | 6.0<br>%      | 0<br>.3<br>9 | 0.<br>6.6<br>%      | -<br>7<br>%   | 16.<br>%       | 0.3<br>9 | 0.7      |
|                              |     |           |               |               |               |              |               |  |          |    | Proportion<br>of Males | 34<br>.5<br>%     | 34.<br>9<br>% | 1<br>.3<br>0 | 0.<br>33.<br>9<br>% | -<br>3.0<br>% | 10<br>3.0<br>% | 0.3<br>2 | 1.0      |
| United States                | --  | --        | --            | --            | --            | --           | --            |  | --       | -- |                        |                   |               |              |                     |               |                |          |          |
| Not United States            | 6   | 21.7<br>% | 12<br>.0<br>% | 36<br>.0<br>% | 17<br>3.<br>5 | 0<br>.1<br>8 | 97<br>.1<br>% |  |          |    |                        |                   |               |              |                     |               |                |          |          |
|                              |     |           |               |               |               |              |               |  |          |    |                        |                   |               |              |                     |               |                |          |          |
| Preclinical students<br>only | 3   | 21.6<br>% | 4.<br>5<br>%  | 61<br>.8<br>% | 12<br>8.<br>3 | 2<br>.4<br>% | 98<br>.4<br>% |  | 0.9<br>9 | 0  |                        |                   |               |              |                     |               |                |          |          |
| Both                         | 2   | 21.4<br>% | 6.<br>6<br>%  | 51<br>.1<br>% | 35<br>.0<br>% | 0<br>.1<br>9 | 97<br>.1<br>% |  |          |    |                        |                   |               |              |                     |               |                |          |          |
| Clinical students only       | --  | --        | --            | --            | --            | --           | --            |  |          |    |                        |                   |               |              |                     |               |                |          |          |
|                              |     |           |               |               |               |              |               |  |          |    |                        |                   |               |              |                     |               |                |          |          |
| NOS <3                       | 6   | 21.7<br>% | 12<br>.0<br>% | 36<br>.0<br>% | 17<br>3.<br>5 | 0<br>.1<br>8 | 97<br>.1<br>% |  | --       | -- |                        |                   |               |              |                     |               |                |          |          |
| NOS ≥3                       | --  | --        | --            | --            | --            | --           | --            |  |          |    |                        |                   |               |              |                     |               |                |          |          |
|                              |     |           |               |               |               |              |               |  |          |    |                        |                   |               |              |                     |               |                |          |          |

| General Health Questionnaire-12 (GHQ-12), ≥4 |                           | No . Studies | Prevalence | LCI    | UCI    | Q    | t a u <sup>2</sup> | I <sup>2</sup> | P for difference | Q (diff) |                     | Slope   | SE     | Z    | P    | LCI     | UCI    | P (mod) | Q (mod) |
|----------------------------------------------|---------------------------|--------------|------------|--------|--------|------|--------------------|----------------|------------------|----------|---------------------|---------|--------|------|------|---------|--------|---------|---------|
|                                              | Cross-sectional           | 4            | 33.0 %     | 24.3 % | 42.9 % | 47.2 | 0.93               | .62 %          | 0.22             | 1.5      | Survey Year         | -1.0 %  | 1.0 %  | -1.3 | 0.33 | -3.0 %  | 1.0 %  | 0.33    | 0.9     |
|                                              | Longitudinal              | 2            | 41.9 %     | 31.4 % | 53.2 % | 3.7  | 0.72               | .71 %          |                  |          | Age                 | 5.5 %   | 6.1 %  | 0.9  | 0.36 | -6.4 %  | 17.4 % | 0.36    | 0.8     |
|                                              |                           |              |            |        |        |      |                    |                |                  |          | Proportion of Males | -29.9 % | 45.4 % | -0.7 | 0.51 | -11.8 % | 59.1 % | 0.51    | 0.4     |
|                                              | United States             | --           | --         | --     | --     | --   | --                 | --             | --               | --       |                     |         |        |      |      |         |        |         |         |
|                                              | Not United States         | 6            | 35.7 %     | 28.5 % | 43.6 % | 56.0 | 0.91               | .12 %          |                  |          |                     |         |        |      |      |         |        |         |         |
|                                              |                           |              |            |        |        |      |                    |                |                  |          |                     |         |        |      |      |         |        |         |         |
|                                              | Preclinical students only | 3            | 38.1 %     | 29.7 % | 47.3 % | 9.6  | 0.79               | .31 %          | 0.55             | 0.4      |                     |         |        |      |      |         |        |         |         |
|                                              | Both                      | 3            | 33.3 %     | 21.9 % | 47.1 % | 46.0 | 0.95               | .72 %          |                  |          |                     |         |        |      |      |         |        |         |         |
|                                              | Clinical students only    | --           | --         | --     | --     | --   | --                 | --             |                  |          |                     |         |        |      |      |         |        |         |         |
|                                              |                           |              |            |        |        |      |                    |                |                  |          |                     |         |        |      |      |         |        |         |         |
|                                              | NOS <3                    | 5            | 34.5       | 26     | 43     | 46   | 0.91               |                | 0.1              | 2.       |                     |         |        |      |      |         |        |         |         |

|  |              |   |           |               |               |         |        |         |  |   |   |  |  |  |  |  |  |  |
|--|--------------|---|-----------|---------------|---------------|---------|--------|---------|--|---|---|--|--|--|--|--|--|--|
|  |              |   | %         | .3<br>%       | .7<br>%       | .7      | .<br>2 | .4<br>% |  | 6 | 0 |  |  |  |  |  |  |  |
|  | NOS $\geq$ 3 | 1 | 41.9<br>% | 37<br>.2<br>% | 46<br>.8<br>% | 0.<br>0 | --     | --      |  |   |   |  |  |  |  |  |  |  |
|  |              |   |           |               |               |         |        |         |  |   |   |  |  |  |  |  |  |  |

Legend: The *P* value marked by the asterisk (\*) denotes a comparison of studies reporting on preclinical students only to those reporting on clinical students only. LCI denotes lower 95% confidence interval; SE, standard error; UCI, upper 95% CI.



**eTable 5. Sensitivity analysis of the prevalence of suicidal ideation among medical students.**

| <b>Study Omitted</b>                    | <b>Prevalence (%)</b> | <b>LCI</b>  | <b>UCI</b>   | <b><math>\tau^2</math></b> | <b><math>I^2</math></b> |
|-----------------------------------------|-----------------------|-------------|--------------|----------------------------|-------------------------|
| Ahmed SA, 2016 <sup>5</sup>             | 11.0%                 | 8.8%        | 13.7%        | 0.34                       | 96.0%                   |
| Alem A, 2005 <sup>11</sup>              | 11.4%                 | 9.1%        | 14.0%        | 0.32                       | 95.9%                   |
| Alexandrino-Silva C, 2009 <sup>12</sup> | 11.0%                 | 8.8%        | 13.6%        | 0.33                       | 96.0%                   |
| Amiri L, 2012 <sup>18</sup>             | 11.3%                 | 9.1%        | 13.9%        | 0.32                       | 96.0%                   |
| Chen JQ, 2004 <sup>41</sup>             | 10.9%                 | 8.7%        | 13.4%        | 0.32                       | 95.6%                   |
| Dahlin M, 2005 <sup>45</sup>            | 11.4%                 | 9.2%        | 14.1%        | 0.32                       | 95.9%                   |
| de Melo Cavestro J, 2006 <sup>48</sup>  | 11.3%                 | 9.1%        | 13.9%        | 0.32                       | 96.0%                   |
| Dyrbye LN, 2008 <sup>54</sup>           | 11.1%                 | 8.8%        | 13.9%        | 0.37                       | 96.0%                   |
| Dyrbye LN, 2014 <sup>57</sup>           | 11.2%                 | 8.8%        | 14.1%        | 0.39                       | 95.9%                   |
| Eskin M, 2011 <sup>61</sup>             | 11.1%                 | 8.9%        | 13.8%        | 0.34                       | 96.0%                   |
| Goebert D, 2009 <sup>65</sup>           | 11.4%                 | 9.1%        | 14.1%        | 0.32                       | 95.8%                   |
| Khokher S, 2005 <sup>94</sup>           | 10.5%                 | 8.6%        | 12.9%        | 0.28                       | 95.2%                   |
| MacLean L, 2015 <sup>106</sup>          | 11.1%                 | 8.9%        | 13.7%        | 0.33                       | 96.0%                   |
| Menezes RG, 2012 <sup>115</sup>         | 11.1%                 | 8.9%        | 13.8%        | 0.33                       | 96.0%                   |
| Okasha A, 1981 <sup>124</sup>           | 11.0%                 | 8.8%        | 13.7%        | 0.33                       | 96.0%                   |
| Osama M, 2014 <sup>126</sup>            | 10.4%                 | 8.7%        | 12.5%        | 0.22                       | 93.9%                   |
| Sobowale K, 2014 <sup>162</sup>         | 11.3%                 | 9.1%        | 14.0%        | 0.33                       | 96.0%                   |
| Thompson D, 2010 <sup>168</sup>         | 10.7%                 | 8.6%        | 13.2%        | 0.31                       | 95.9%                   |
| Tin TS, 2015 <sup>170</sup>             | 11.3%                 | 9.1%        | 14.0%        | 0.32                       | 95.9%                   |
| Tran QA, 2015 <sup>172</sup>            | 11.2%                 | 8.9%        | 14.0%        | 0.35                       | 95.9%                   |
| Tyssen R, 2001 <sup>173</sup>           | 11.0%                 | 8.8%        | 13.6%        | 0.33                       | 95.9%                   |
| Wallin U, 2003 <sup>180</sup>           | 11.0%                 | 8.8%        | 13.7%        | 0.33                       | 96.0%                   |
| Wan YH, 2012 <sup>181</sup>             | 11.5%                 | 9.5%        | 14.0%        | 0.26                       | 94.5%                   |
| Wege N, 2016 <sup>183</sup>             | 11.3%                 | 9.1%        | 14.0%        | 0.33                       | 95.9%                   |
| <b>Pooled estimate</b>                  | <b>11.1%</b>          | <b>9.0%</b> | <b>13.7%</b> | <b>0.32</b>                | <b>95.8%</b>            |

Legend: Studies are ordered alphabetically by first author. Summary estimates were calculated omitting one study at a time using a random effects model.

**eTable 6. Sensitivities and specificities of commonly used instruments for diagnosing major depressive disorder**

| Instrument                                                              | Cutoff | Sensitivity    | Specificity    |
|-------------------------------------------------------------------------|--------|----------------|----------------|
| Aga Khan University Anxiety and Depression Scale (AKUADS) <sup>82</sup> | ≥19    | 74             | 81             |
| Beck Depression Inventory (BDI) <sup>196</sup>                          | ≥10    | 91 (86 to 96)  | 79 (52 to 100) |
| Beck Depression Inventory (BDI) <sup>197</sup>                          | ≥16    | 79             | 91             |
| Beck Depression Inventory-II (BDI-II) <sup>198</sup>                    | ≥10    | 100            | 75             |
| Beck Depression Inventory-II (BDI-II) <sup>198</sup>                    | ≥14    | 88             | 84             |
| Beck Depression Inventory-II (BDI-II) <sup>198</sup>                    | ≥17    | 81             | 79             |
| Beck Depression Inventory-II (BDI-II) <sup>198</sup>                    | ≥20    | 82             | 75             |
| Center for Epidemiological Studies Depression (CES-D) <sup>196</sup>    | ≥16    | 84 (70 to 89)  | 74 (68 to 80)  |
| Depression Anxiety Stress Scale-21 (DASS-21) <sup>199</sup>             | ≥10    | 91             | 40             |
| Depression Anxiety Stress Scale-42 (DASS-42) <sup>199</sup>             | ≥10    | 91             | 40             |
| General Depression Scale Short Form (ADS-K) <sup>200</sup>              | >17    | 89.7           | 87             |
| General Health Questionnaire-12 (GHQ-12) <sup>196</sup>                 | ≥4     | 86 (76 to 95)  | 66 (57 to 74)  |
| Health-Related Self-Reported Scale (HRSRS) <sup>201</sup>               | ≥25    | 75.1           | 93.4           |
| Hospital Anxiety and Depression Scale (HADS-D) <sup>202</sup>           | ≥11    | 61             | 97             |
| Hospital Anxiety and Depression Scale (HADS-D) <sup>202</sup>           | ≥12    | 50             | 98             |
| Hospital Anxiety and Depression Scale (HADS-D) <sup>202</sup>           | ≥7     | 83             | 84             |
| Hospital Anxiety and Depression Scale (HADS-D) <sup>202</sup>           | ≥8     | 80             | 88             |
| Kutcher Adolescent Depression Scale (KADS) <sup>203</sup>               | ≥6     | 92             | 71             |
| Patient Health Questionnaire-9 (PHQ-9) <sup>204</sup>                   | ≥10    | 88             | 88             |
| Patient Health Questionnaire-9 (PHQ-9) <sup>204</sup>                   | ≥9     | 95             | 84             |
| Patient Health Questionnaire-9 (PHQ-9) <sup>204</sup>                   | >10    | 83             | 89             |
| Primary Care Evaluation of Mental Disorders (PRIME-MD) <sup>196</sup>   | ≥1     | 91 (81 to 100) | 66 (48 to 84)  |
| Zung Self-Rating Depression Scale (Zung-SDS) <sup>205</sup>             | ≥40    | 89             | 75             |
| Zung Self-Rating Depression Scale (Zung-SDS) <sup>196</sup>             | ≥50    | 86 (73 to 100) | 76 (57 to 95)  |

Legend: Sensitivities and specificities (and where available, 95% confidence intervals) for the diagnosis of criterion-defined major depressive disorder (MDD) for selected depression screening instruments at various cutoffs are reported above as published in the contemporary literature.

eFigure 1.

eFigure 1. Meta-analysis of the percentage of medical students who screened positive for depression and sought psychiatric or other mental health treatment

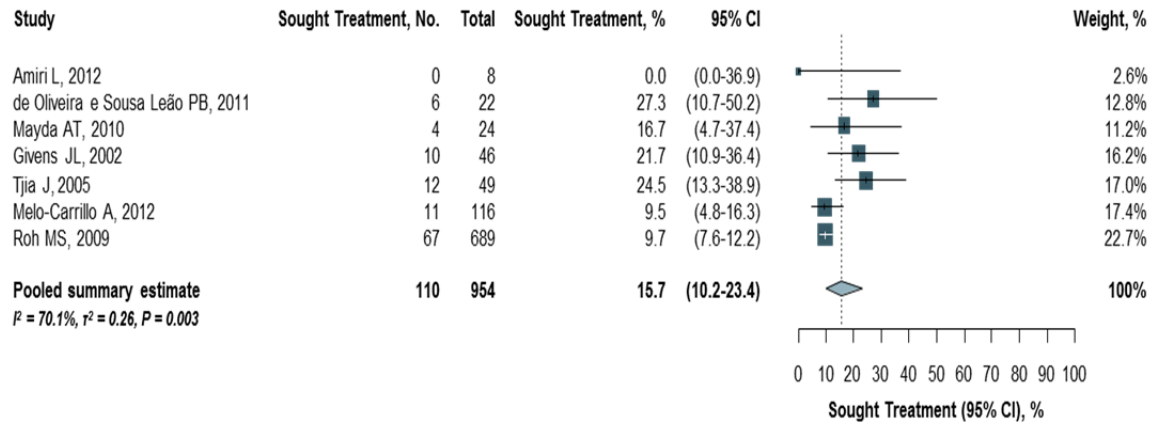

Legend: Contributing studies are sorted by increasing sample size. The dotted line marks the overall summary estimate for all studies, 15.7% (110/954 individuals, 95% CI: 10.3-23.4%,  $Q = 20.1$ ,  $\tau^2 = 0.26$ ,  $I^2 = 70.1\%$ ). The area of each square is proportional to the inverse variance of the estimate. Horizontal lines indicate 95% confidence intervals of the estimate.

eFigure 2.

**eFigure 2.** Assessment of small study effects by funnel plot for the 183 studies reporting on depression or depressive symptom prevalence

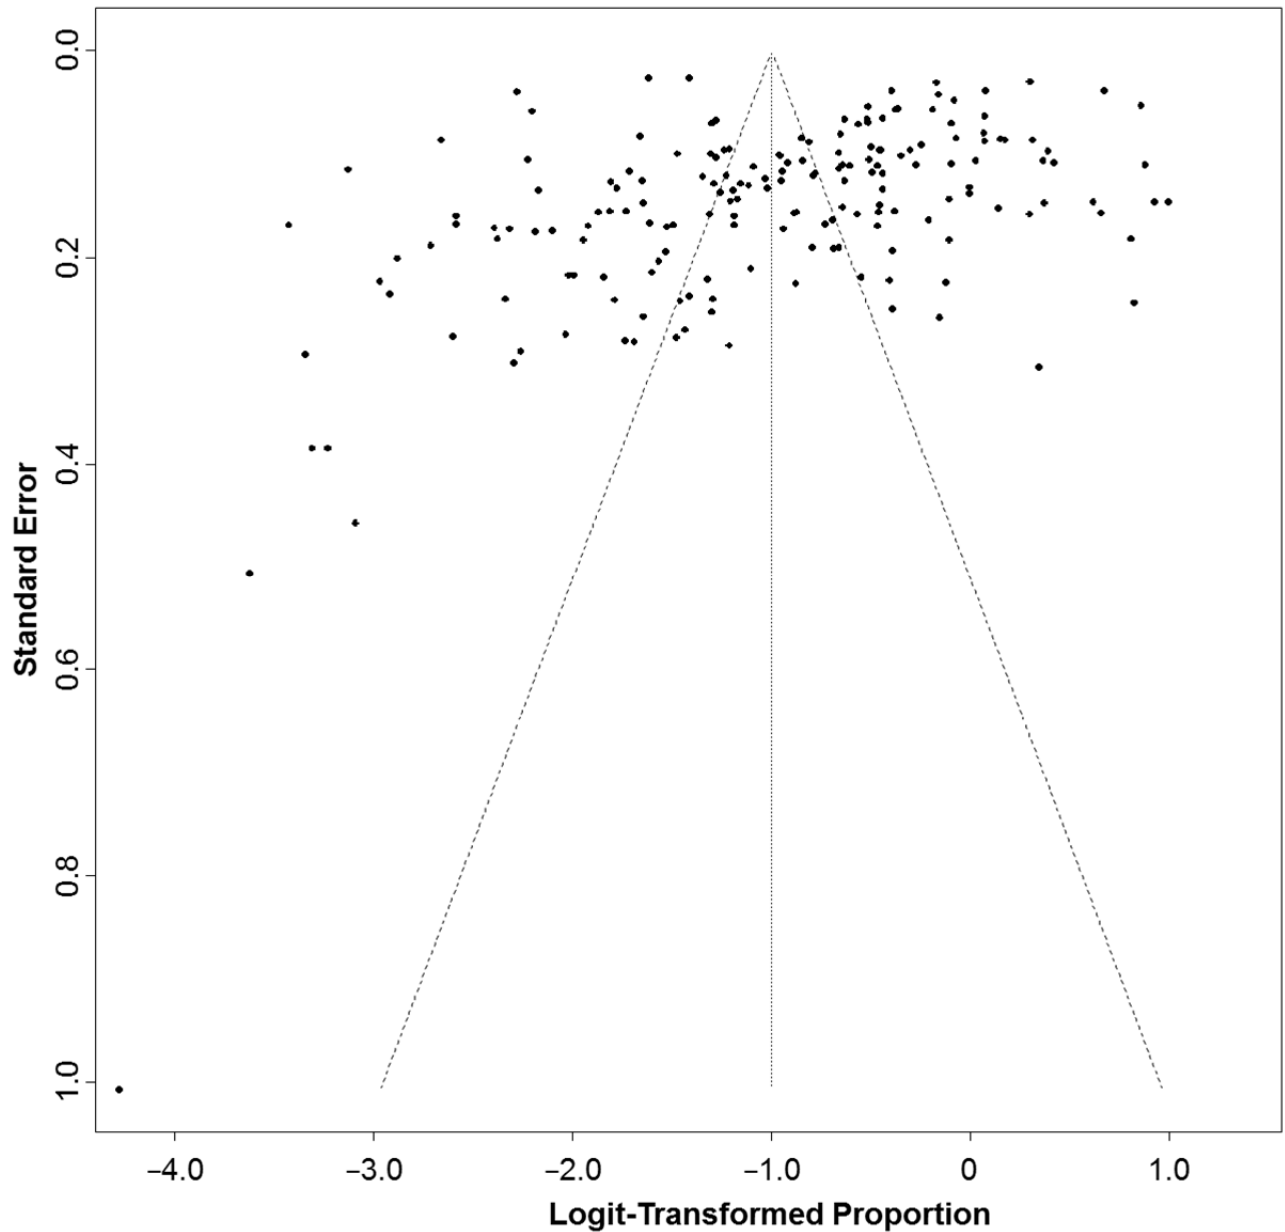

Legend: The contour lines define the region within which 95% of points would be expected to lie in the absence of both heterogeneity and publication bias. The total overall estimate of the meta-analysis is represented by the vertical line. There was evidence of significant publication bias (Egger's test  $P = 0.001$ ).

eFigure 3.

**eFigure 3.** Assessment of small study effects by funnel plot for the 24 studies reporting on suicidal ideation prevalence

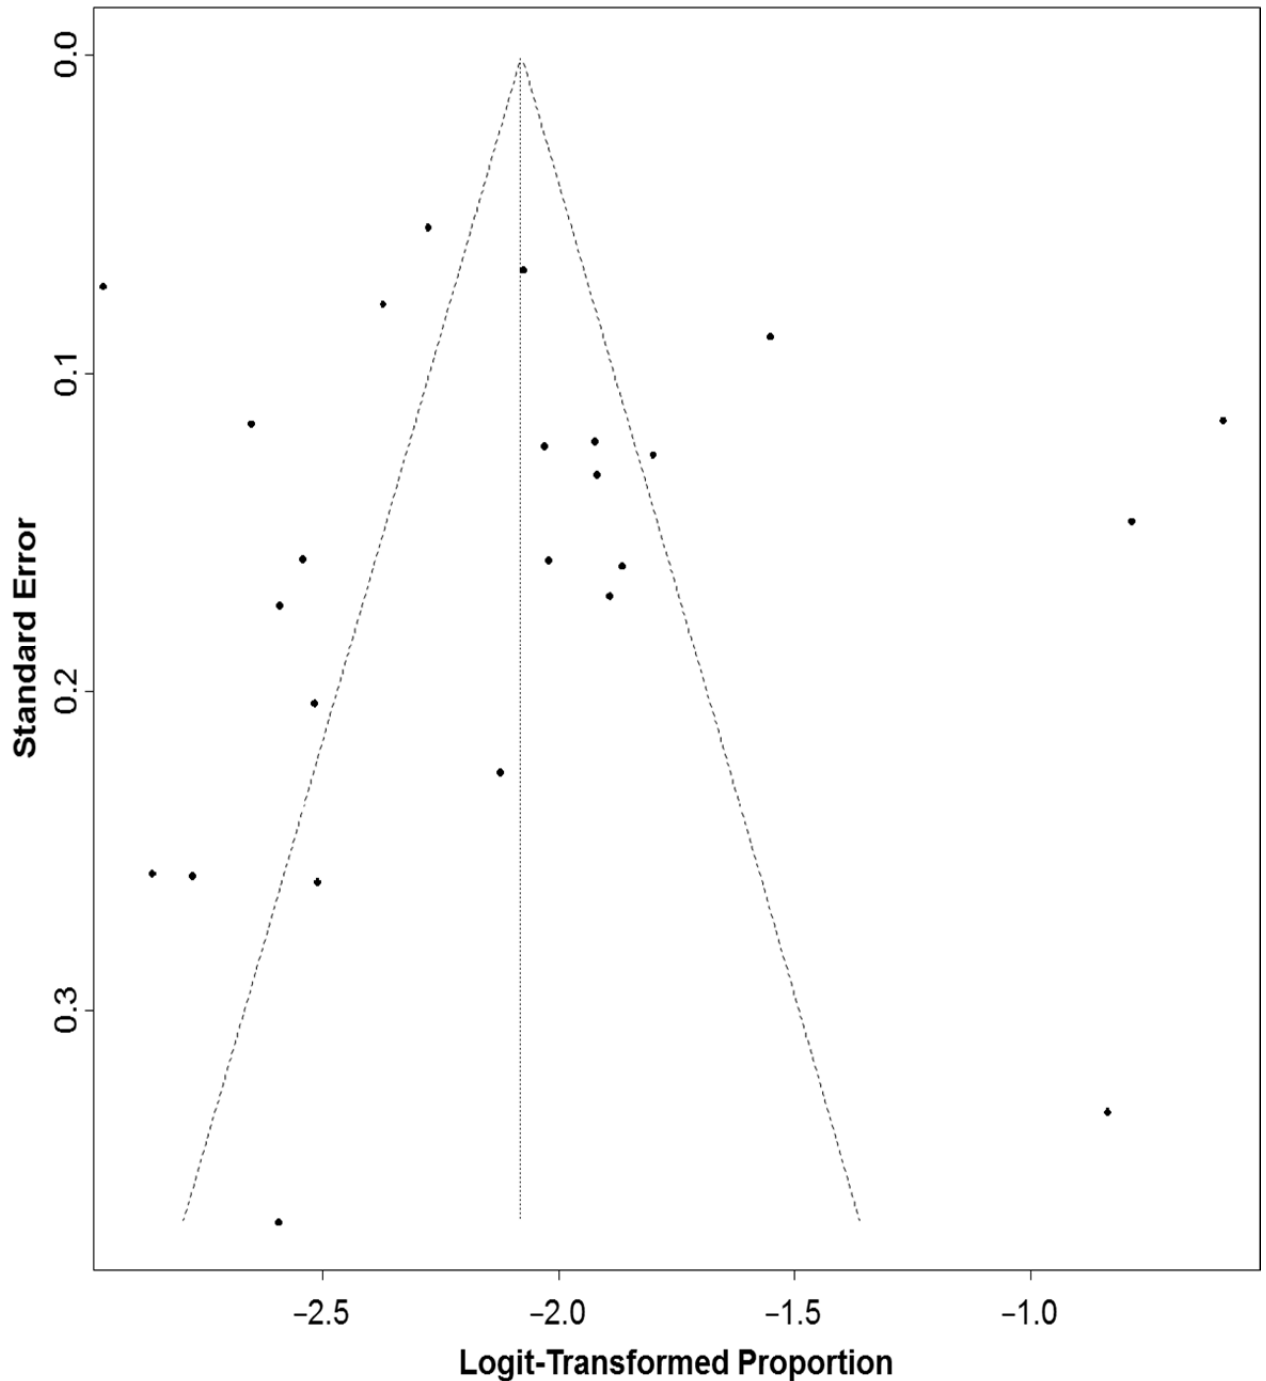

Legend: The contour lines define the region within which 95% of points would be expected to lie in the absence of both heterogeneity and publication bias. The total overall estimate of the meta-analysis is represented by the vertical line. There was minimal asymmetry, suggesting the absence of significant publication bias (Egger's test  $P = 0.49$ ).

## eReferences

1. Abdel Wahed WY, Hassan SK. Prevalence and associated factors of stress, anxiety and depression among medical Fayoum University students. *Alex J Med*. 2016. doi:10.1016/j.ajme.2016.01.005.
2. Adamiak G, Swiatnicka E, Wolodzko-Makarska L, Switalska MJ. [Assessment of quality of life of medical students relative to the number and intensity of depressive symptoms]. *Psychiatr Pol*. 2004;38(4):631-638.
3. Aghakhani N, Sharif Nia H, Eghtedar S, Rahbar N, Jasemi M, Mesgar Zadeh M. Prevalence of depression among students of urmia university of medical sciences (iran). *Iran J Psychiatry Behav Sci*. 2011;5(2):131-135.
4. Ahmed I, Banu H, Al-Fageer R, Al-Suwaidi R. Cognitive emotions: depression and anxiety in medical students and staff. *J Crit Care*. 2009;24(3):e1-7. doi:10.1016/j.jcrc.2009.06.003.
5. Ahmed SA, Omar QH, Abo Elamaim AA. Forensic analysis of suicidal ideation among medical students of Egypt: A crossectional study. *J Forensic Leg Med*. 2016;44:1-4. doi:10.1016/j.jflm.2016.08.009.
6. Akbari V, Hajian A, Damirchi P. Prevalence of emotional disorders among students of University of Medical Sciences; Iran. *Open Psychol J*. 2014;7. doi:10.2174/1874350101407010029.
7. Aktekin M, Karaman T, Senol YY, Erdem S, Erengin H, Akaydin M. Anxiety, depression and stressful life events among medical students: a prospective study in Antalya, Turkey. *Med Educ*. 2001;35(1):12-17.
8. Akvardar Y, Demiral Y, Ergör G, Ergör A, Bilici M, Akil Ozer O. Substance use in a sample of Turkish medical students. *Drug Alcohol Depend*. 2003;72(2):117-121.
9. Akvardar Y, Demiral Y, Ergor G, Ergor A. Substance use among medical students and physicians in a medical school in Turkey. *Soc Psychiatry Psychiatr Epidemiol*. 2004;39(6):502-506. doi:10.1007/s00127-004-0765-1.
10. Al-Faris EA, Irfan F, Van der Vleuten CPM, et al. The prevalence and correlates of depressive symptoms from an Arabian setting: a wake up call. *Med Teach*. 2012;34 Suppl 1:S32-36. doi:10.3109/0142159X.2012.656755.
11. Alem A, Araya M, Melaku Z, Wendimagegn D, Abdulahi A. Mental distress in medical students of Addis Ababa University. *Ethiop Med J*. 2005;43(3):159-166.
12. Alexandrino-Silva C, Pereira MLG, Bustamante C, et al. Suicidal ideation among students enrolled in healthcare training programs: a cross-sectional study. *Rev Bras Psiquiatr São Paulo Braz* 1999. 2009;31(4):338-344.

13. AlFaris EA, Naeem N, Irfan F, Qureshi R, van der Vleuten C. Student centered curricular elements are associated with a healthier educational environment and lower depressive symptoms in medical students. *BMC Med Educ*. 2014;14((AlFaris E.A.)):192.
14. Ali FA, Javed N, Manzur F. Anxiety and depression among medical students during exams. *Pak J Med Health Sci*. 2015;9(1):119-122.
15. Alvi T, Assad F, Ramzan M, Khan FA. Depression, anxiety and their associated factors among medical students. *J Coll Physicians Surg--Pak JCPSP*. 2010;20(2):122-126. doi:02.2010/JCPSP.122126.
16. Amaral GF do, Gomide LM de P, Batista M de P, et al. Sintomas depressivos em acadêmicos de medicina da Universidade Federal de Goiás: Um estudo de prevalência. = Depressive symptoms in medical students of Universidade Federal de Goiás: A prevalence study. *Rev Psiquiatr Rio Gd Sul*. 2008;30(2):124-130. doi:10.1590/S0101-81082008000300008.
17. Amir M, Gillany A. Self-reported depression and anxiety by students at an Egyptian Medical School. *J Pak Psychiatr Soc*. 2010;7(2). [http://www.jpss.com.pk/article/selfreporteddepressionandanxietybystudentsatanegyptianmedicalschoo\\_2407.html](http://www.jpss.com.pk/article/selfreporteddepressionandanxietybystudentsatanegyptianmedicalschoo_2407.html).
18. Amiri L, Voracek M, Yousef S, et al. Suicidal behavior and attitudes among medical students in the United Arab Emirates. *Crisis J Crisis Interv Suicide Prev*. 2013;34(2):116-123. doi:10.1027/0227-5910/a000170.
19. Angkurawaranon C, Jiraporncharoen W, Sachdev A, Wisetborisut A, Jangiam W, Uaphanthasath R. Predictors of quality of life of medical students and a comparison with quality of life of adult health care workers in Thailand. *SpringerPlus*. 2016;5:584. doi:10.1186/s40064-016-2267-5.
20. Aniebue PN, Onyema GO. Prevalence of depressive symptoms among Nigerian medical undergraduates. *Trop Doct*. 2008;38(3):157-158. doi:10.1258/td.2007.070202.
21. Ashor AW. Smoking dependence and common psychiatric disorders in medical students: Cross-sectional study. *Pak J Med Sci*. 2012;28(4):670-674.
22. Ashton CH, Kamali F. Personality, lifestyles, alcohol and drug consumption in a sample of British medical students. *Med Educ*. 1995;29(3):187-192. doi:10.1111/j.1365-2923.1995.tb02828.x.
23. Aziz NAHA, Al-Muwallad OK, Mansour EAK. Neurotic depression and chocolate among female medical students at College of Medicine, Taibah University Almadinah Almunawwarah, Kingdom of Saudi Arabia. *J Taibah Univ Med Sci*. 2011;6(2):139-147.



24. Bahri Yusoff MS, Abdul Rahim AF, Yaacob MJ. The prevalence of final year medical students with depressive symptoms and its contributing factors. *Int Med J*. 2011;18(4):305-309.
25. Baldassin S, Alves TC de TF, de Andrade AG, Nogueira Martins LA. The characteristics of depressive symptoms in medical students during medical education and training: a cross-sectional study. *BMC Med Educ*. 2008;8:60. doi:10.1186/1472-6920-8-60.
26. Basnet B, Jaiswal M, Adhikari B, Shyangwa PM. Depression among undergraduate medical students. *Kathmandu Univ Med J KUMJ*. 2012;10(39):56-59.
27. Bassols AM, Okabayashi LS, Silva AB da, et al. First- and last-year medical students: is there a difference in the prevalence and intensity of anxiety and depressive symptoms? *Rev Bras Psiquiatr São Paulo Braz* 1999. 2014;36(3):233-240.
28. Bayati A, Beigi M, Salehi M. Depression prevalence and related factors in Iranian students. *Pak J Biol Sci PJBS*. 2009;12(20):1371-1375.
29. Baykan Z, Naçar M, Cetinkaya F. Depression, anxiety, and stress among last-year students at Erciyes University Medical School. *Acad Psychiatry J Am Assoc Dir Psychiatr Resid Train Assoc Acad Psychiatry*. 2012;36(1):64-65. doi:10.1176/appi.ap.11060125.
30. Berner JE, Santander J, Contreras AM, Gómez T. Description of internet addiction among Chilean medical students: a cross-sectional study. *Acad Psychiatry J Am Assoc Dir Psychiatr Resid Train Assoc Acad Psychiatry*. 2014;38(1):11-14. doi:10.1007/s40596-013-0022-6.
31. Bore M, Kelly B, Nair B. Potential predictors of psychological distress and well-being in medical students: a cross-sectional pilot study. *Adv Med Educ Pract*. 2016;7:125-135. doi:10.2147/AMEP.S96802.
32. Borst JM, Frings-Dresen MHW, Sluiter JK. Prevalence and incidence of mental health problems among Dutch medical students and the study-related and personal risk factors: a longitudinal study. *Int J Adolesc Med Health*. August 2015. doi:10.1515/ijamh-2015-0021.
33. Bunevicius A, Katkute A, Bunevicius R. Symptoms of anxiety and depression in medical students and in humanities students: Relationship with big-five personality dimensions and vulnerability to stress. *Int J Soc Psychiatry*. 2008;54(6):494-501. doi:10.1177/0020764008090843.
34. Camp DL, Hollingsworth MA, Zaccaro DJ, Cariaga-Lo LD, Richards BF. Does a problem-based learning curriculum affect depression in medical students? *Acad Med J Assoc Am Med Coll*. 1994;69(10 Suppl):S25-27.

35. Carter FA, Bell CJ, Ali AN, McKenzie J, Wilkinson TJ. The impact of major earthquakes on the psychological functioning of medical students: A Christchurch, New Zealand study. *N Z Med J*. 2014;127(1398):54-66.
36. Castaldelli-Maia JM, Martins SS, Bhugra D, et al. Does ragging play a role in medical student depression - cause or effect? *J Affect Disord*. 2012;139(3):291-297. doi:10.1016/j.jad.2012.02.003.
37. Chan DW. Depressive symptoms and depressed mood among Chinese medical students in Hong Kong. *Compr Psychiatry*. 1991;32(2):170-180.
38. Chan DW. Coping with depressed mood among Chinese medical students in Hong Kong. *J Affect Disord*. 1992;24(2):109-116.
39. Chandavarkar U, Azzam A, Mathews CA. Anxiety symptoms and perceived performance in medical students. *Depress Anxiety*. 2007;24(2):103-111. doi:10.1002/da.20185.
40. Chang E, Eddins-Folensbee F, Coverdale J. Survey of the prevalence of burnout, stress, depression, and the use of supports by medical students at one school. *Acad Psychiatry J Am Assoc Dir Psychiatr Resid Train Assoc Acad Psychiatry*. 2012;36(3):177-182. doi:10.1176/appi.ap.11040079.
41. Chen JQ, Han P, Dunne MP. Child sexual abuse: a study among 892 female students of a medical school. *Zhonghua Er Ke Za Zhi Chin J Pediatr*. 2004;42(1):39-43.
42. Choi J, Son SL, Kim SH, Kim H, Hong J-Y, Lee M-S. [The prevalence of burnout and the related factors among some medical students in Korea]. *Korean J Med Educ*. 2015;27(4):301-308. doi:10.3946/kjme.2015.27.4.301.
43. Clark DC, Zeldow PB. Vicissitudes of depressed mood during four years of medical school. *JAMA*. 1988;260(17):2521-2528.
44. Costa EF de O, Santana YS, Santos ATR de A, Martins LAN, Melo EV de, Andrade TM de. [Depressive symptoms among medical intern students in a Brazilian public university]. *Rev Assoc Médica Bras 1992*. 2012;58(1):53-59.
45. Dahlin M, Joneborg N, Runeson B. Stress and depression among medical students: a cross-sectional study. *Med Educ*. 2005;39(6):594-604. doi:10.1111/j.1365-2929.2005.02176.x.
46. Dahlin M, Nilsson C, Stotzer E, Runeson B. Mental distress, alcohol use and help-seeking among medical and business students: a cross-sectional comparative study. *BMC Med Educ*. 2011;11:92. doi:10.1186/1472-6920-11-92.

47. David MA, Hamid Hashmi SS. Study to evaluate prevalence of depression, sleep wake pattern and their relation with use of social networking sites among first year medical students. *Int J Pharma Med Biol Sci*. 2013;2(1):27-31.
48. de Melo Cavestro J, Rocha FL. Prevalência de depressão entre estudantes universitários. = Depression prevalence among university students. *J Bras Psiquiatr*. 2006;55(4):264-267. doi:10.1590/S0047-20852006000400001.
49. de Oliveira e Sousa Leão PB, Martins LAN, Menezes PR, Bellodi PL. Well-being and help-seeking: An exploratory study among final-year medical students. *Rev Assoc Med Bras*. 2011;57(4):379-386.
50. De Sousa Lima L, Ferry V, Martins Fonseca RN, Ferreira Silva Jr. G, De Sousa Jidão FR. Depressive symptoms among medical students of the State University of Maranhão. *Rev Neurocienc*. 2010;18(1):8-12.
51. Del-Ben CM, Machado VF, Madisson MM, Resende TL, Valério FP, Troncon LEDA. Relationship between academic performance and affective changes during the first year at medical school. *Med Teach*. 2013;35(5):404-410. doi:10.3109/0142159X.2013.769675.
52. Dyrbye LN, Thomas MR, Huntington JL, et al. Personal Life Events and Medical Student Burnout: A Multicenter Study. *Acad Med*. 2006;81(4):374-384. doi:10.1097/00001888-200604000-00010.
53. Dyrbye LN, Thomas MR, Eacker A, et al. Race, ethnicity, and medical student well-being in the United States. *Arch Intern Med*. 2007;167(19):2103-2109. doi:10.1001/archinte.167.19.2103.
54. Dyrbye LN, Thomas MR, Massie FS, et al. Burnout and suicidal ideation among U.S. medical students. *Ann Intern Med*. 2008;149(5):334-341.
55. Dyrbye LN, Massie FS, Eacker A, et al. Relationship between burnout and professional conduct and attitudes among US medical students. *JAMA*. 2010;304(11):1173-1180. doi:10.1001/jama.2010.1318.
56. Dyrbye LN, Moutier C, Durning SJ, et al. The problems program directors inherit: medical student distress at the time of graduation. *Med Teach*. 2011;33(9):756-758. doi:10.3109/0142159X.2011.577468.
57. Dyrbye LN, West CP, Satele D, et al. Burnout among U.S. medical students, residents, and early career physicians relative to the general U.S. population. *Acad Med J Assoc Am Med Coll*. 2014;89(3):443-451. doi:10.1097/ACM.0000000000000134.
58. Dyrbye LN, Eacker A, Durning SJ, et al. The Impact of Stigma and Personal Experiences on the Help-Seeking Behaviors of Medical Students With Burnout.

*Acad Med J Assoc Am Med Coll.* 2015;90(7):961-969.  
doi:10.1097/ACM.0000000000000655.

59. El-Gilany AH, Amr M, Hammad S. Perceived stress among male medical students in Egypt and Saudi Arabia: effect of sociodemographic factors. *Ann Saudi Med.* 2008;28(6):442-448.
60. Eller T, Aluoja A, Vasar V, Veldi M. Symptoms of anxiety and depression in Estonian medical students with sleep problems. *Depress Anxiety.* 2006;23(4):250-256. doi:10.1002/da.20166.
61. Eskin M, Voracek M, Stieger S, Altinyazar V. A cross-cultural investigation of suicidal behavior and attitudes in Austrian and Turkish medical students. *Soc Psychiatry Psychiatr Epidemiol.* 2011;46(9):813-823. doi:10.1007/s00127-010-0254-7.
62. Farhangiz S, Mohebpour F, Salehi A. Assessment of Mental Health among Iranian Medical Students: A Cross-Sectional Study. *Int J Health Sci.* 2016;10(1):49-55.
63. Ghodasara SL, Davidson MA, Reich MS, Savoie CV, Rodgers SM. Assessing student mental health at the Vanderbilt University School of Medicine. *Acad Med J Assoc Am Med Coll.* 2011;86(1):116-121. doi:10.1097/ACM.0b013e3181ffbf056.
64. Givens JL, Tjia J. Depressed medical students' use of mental health services and barriers to use. *Acad Med J Assoc Am Med Coll.* 2002;77(9):918-921.
65. Goebert D, Thompson D, Takeshita J, et al. Depressive symptoms in medical students and residents: a multischool study. *Acad Med J Assoc Am Med Coll.* 2009;84(2):236-241. doi:10.1097/ACM.0b013e31819391bb.
66. Gold JA, Johnson B, Leydon G, Rohrbaugh RM, Wilkins KM. Mental health self-care in medical students: a comprehensive look at help-seeking. *Acad Psychiatry J Am Assoc Dir Psychiatr Resid Train Assoc Acad Psychiatry.* 2015;39(1):37-46. doi:10.1007/s40596-014-0202-z.
67. Guerrero López JB, Heinze Martin G, Ortiz de León S, Cortés Morelos J, Barragán Pérez V, Flores-Ramos M. [Factors that predict depression in medical students]. *Gac Médica México.* 2013;149(6):598-604.
68. Güleç M, Bakir B, Ozer M, Uçar M, Kiliç S, Hasde M. Association between cigarette smoking and depressive symptoms among military medical students in Turkey. *Psychiatry Res.* 2005;134(3):281-286. doi:10.1016/j.psychres.2003.02.001.
69. Gupta S, Basak P. Depression and type D personality among undergraduate medical students. *Indian J Psychiatry.* 2013;55(3):287-289. doi:10.4103/0019-5545.117151.

70. Guthrie E, Black D, Bagalkote H, Shaw C, Campbell M, Creed F. Psychological stress and burnout in medical students: a five-year prospective longitudinal study. *J R Soc Med*. 1998;91(5):237.
71. Haglund MEM, aan het Rot M, Cooper NS, et al. Resilience in the third year of medical school: a prospective study of the associations between stressful events occurring during clinical rotations and student well-being. *Acad Med J Assoc Am Med Coll*. 2009;84(2):258-268. doi:10.1097/ACM.0b013e31819381b1.
72. Hardeman RR, Przedworski JM, Burke SE, et al. Mental Well-Being in First Year Medical Students: A Comparison by Race and Gender. *J Racial Ethn Health Disparities*. 2015;2(3):403-413. doi:10.1007/s40615-015-0087-x.
73. Helmers KF, Danoff D, Steinert Y, Leyton M, Young SN. Stress and depressed mood in medical students, law students, and graduate students at McGill University. *Acad Med J Assoc Am Med Coll*. 1997;72(8):708-714.
74. Hendryx MS, Haviland MG, Shaw DG. Dimensions of alexithymia and their relationships to anxiety and depression. *J Pers Assess*. 1991;56(2):227-237. doi:10.1207/s15327752jpa5602\_4.
75. Herzog DB, Borus JF, Hamburg P, Ott IL, Concus A. Substance use, eating behaviors, and social impairment of medical students. *J Med Educ*. 1987;62(8):651-657.
76. Hirata FC, Lima MCO, de Bruin VMS, Nóbrega PR, Wenceslau GP, de Bruin PFC. Depression in medical school: the influence of morningness-eveningness. *Chronobiol Int*. 2007;24(5):939-946. doi:10.1080/07420520701657730.
77. Honney K, Buszewicz M, Coppola W, Griffin M. Comparison of levels of depression in medical and non-medical students. *Clin Teach*. 2010;7(3):180-184. doi:10.1111/j.1743-498X.2010.00384.x.
78. Ibrahim MB, Abdelreheem MH. Prevalence of anxiety and depression among medical and pharmaceutical students in Alexandria University. *Alex J Med*. 2015;51(2):167-173.
79. Ibrahim N, Al-Kharboush D, El-Khatib L, Al-Habib A, Asali D. Prevalence and Predictors of Anxiety and Depression among Female Medical Students in King Abdulaziz University, Jeddah, Saudi Arabia. *Iran J Public Health*. 2013;42(7):726-736.
80. Ibrahim NKR, Battarjee WF, Almeahmadi SA. Prevalence and predictors of irritable bowel syndrome among medical students and interns in King Abdulaziz University, Jeddah. *Libyan J Med*. 2013;8:21287.
81. Imran N, Tariq KF, Pervez MI, Jawaid M, Haider II. Medical Students' Stress, Psychological Morbidity, and Coping Strategies: a Cross-Sectional Study from

Pakistan. *Acad Psychiatry J Am Assoc Dir Psychiatr Resid Train Assoc Acad Psychiatry*. 2016;40(1):92-96.

82. Inam SB. Anxiety and Depression among Students of a Medical College in Saudi Arabia. *Int J Health Sci*. 2007;1(2):295-300.
83. Inam SNB, Saqib A, Alam E. Prevalence of anxiety and depression among medical students of private university. *JPMA J Pak Med Assoc*. 2003;53(2):44-47.
84. Iqbal S, Gupta S, Venkatarao E. Stress, anxiety & depression among medical undergraduate students & their socio-demographic correlates. *Indian J Med Res*. 2015;141(3):354-357.
85. Jackson ER, Shanafelt TD, Hasan O, Satele DV, Dyrbye LN. Burnout and Alcohol Abuse/Dependence Among U.S. Medical Students. *Acad Med J Assoc Am Med Coll*. 2016;91(9):1251-1256. doi:10.1097/ACM.0000000000001138.
86. Jadoon NA, Yaqoob R, Raza A, Shehzad MA, Zeshan SC. Anxiety and depression among medical students: a cross-sectional study. *JPMA J Pak Med Assoc*. 2010;60(8):699-702.
87. James D, Yates J, Ferguson E. Can the 12-item General Health Questionnaire be used to identify medical students who might “struggle” on the medical course? A prospective study on two cohorts. *BMC Med Educ*. 2013;13:48. doi:10.1186/1472-6920-13-48.
88. Jeong Y, Kim JY, Ryu JS, Lee KE, Ha EH, Park H. The Associations between Social Support, Health-Related Behaviors, Socioeconomic Status and Depression in Medical Students. *Epidemiol Health*. 2010;32:e2010009. doi:10.4178/epih/e2010009.
89. Jurkat HB, Richter L, Cramer M, et al. Depressivität und stressbewältigung bei medizinstudierenden: Eine vergleichsuntersuchung des 1. und 7. fachsemesters humanmedizin. = Depression and stress management in medical students. A comparative study between freshman and advanced medical students. *Nervenarzt*. 2011;82(5):646-652. doi:10.1007/s00115-010-3039-z.
90. Karaoğlu N, Şeker M. Anxiety and depression levels of preclinic years' medical students and probable effective factors. *TAF Prev Med Bull*. 2011;10(3):303-312.
91. Kaya M, Genç M, Kaya B, Pehlivan E. [Prevalence of depressive symptoms, ways of coping, and related factors among medical school and health services higher education students]. *Türk Psikiyatri Derg Turk J Psychiatry*. 2007;18(2):137-146.
92. Khan MA, Haider Z, Khokhar M. Anxiety and depression in 3rd year MBBS students of CMH Lahore medical college, Lahore, Pakistan. *Rawal Med J*. 2015;40(1):21-23.

93. Khan MS, Mahmood S, Badshah A, Ali SU, Jamal Y. Prevalence of depression, anxiety and their associated factors among medical students in Karachi, Pakistan. *JPMA J Pak Med Assoc.* 2006;56(12):583-586.
94. Khokher S, Khan MM. Suicidal Ideation in Pakistani College Students. *Crisis J Crisis Interv Suicide Prev.* 2005;26(3):125-127. doi:10.1027/0227-5910.26.3.125.
95. Kim B, Roh H. Depressive symptoms in medical students: prevalence and related factors. *Korean J Med Educ.* 2014;26(1):53-58. doi:10.3946/kjme.2014.26.1.53.
96. Kohls N, Büssing A, Sauer S, et al. [Psychological distress in medical students - a comparison of the Universities of Munich and Witten/Herdecke]. *Z Für Psychosom Med Psychother.* 2012;58(4):409-416. doi:10.13109/zptm.2012.58.4.409.
97. Kongsomboon K. Psychological problems and overweight in medical students compared to students from Faculty of Humanities, Srinakharinwirot University, Thailand. *J Med Assoc Thai Chotmaihet Thangphaet.* 2010;93 Suppl 2:S106-113.
98. Kötter T, Tautphäus Y, Scherer M, Voltmer E. Health-promoting factors in medical students and students of science, technology, engineering, and mathematics: design and baseline results of a comparative longitudinal study. *BMC Med Educ.* 2014;14:134. doi:10.1186/1472-6920-14-134.
99. Kulsoom B, Afsar NA. Stress, anxiety, and depression among medical students in a multiethnic setting. *Neuropsychiatr Dis Treat.* 2015;11.
100. Kumar GS, Jain A, Hegde S. Prevalence of depression and its associated factors using Beck Depression Inventory among students of a medical college in Karnataka. *Indian J Psychiatry.* 2012;54(3):223-226. doi:10.4103/0019-5545.102412.
101. Lapinski J, Yost M, Sexton P, LaBaere RJ. Factors Modifying Burnout in Osteopathic Medical Students. *Acad Psychiatry J Am Assoc Dir Psychiatr Resid Train Assoc Acad Psychiatry.* 2016;40(1):55-62.
102. Levine RE, Litwins SD, Frye AW. An evaluation of depressed mood in two classes of medical students. *Acad Psychiatry J Am Assoc Dir Psychiatr Resid Train Assoc Acad Psychiatry.* 2006;30(3):235-237. doi:10.1176/appi.ap.30.3.235.
103. Liao Y, Knoesen NP, Castle DJ, et al. Symptoms of disordered eating, body shape, and mood concerns in male and female Chinese medical students. *Compr Psychiatry.* 2010;51(5):516-523. doi:10.1016/j.comppsy.2009.11.007.
104. Ludwig AB, Burton W, Weingarten J, Milan F, Myers DC, Kligler B. Depression and stress amongst undergraduate medical students. *BMC Med Educ.* 2015;15:141. doi:10.1186/s12909-015-0425-z.

105. Lupo MK, Strous RD. Religiosity, anxiety and depression among Israeli medical students. *Isr Med Assoc J IMAJ*. 2011;13(10):613-618.
106. MacLean L, Booza J, Balon R. The Impact of Medical School on Student Mental Health. *Acad Psychiatry J Am Assoc Dir Psychiatr Resid Train Assoc Acad Psychiatry*. 2016;40(1):89-91.
107. Manaf NA, Saravanan C, Zuhrah B. The prevalence and inter-relationship of negative body image perception, depression and susceptibility to eating disorders among female medical undergraduate students. *J Clin Diagn Res*. 2016;10(3):VC01-VC04.
108. Mancevska S, Bozinovska L, Tecce J, Pluncevik-Gligoroska J, Sivevska-Smilevska E. Depression, anxiety and substance use in medical students in the Republic of Macedonia. *Bratisl Med J*. 2008;109(12):568-572.
109. Marakoğlu K, Çivi S, Şahsivar Ş, Özdemir S. Tıp Fakültesi Birinci ve İkinci Sınıf Öğrencilerinde Sıgara İçme Durumu ve Depresyon Yaygınlığı Arasındaki İlişki. = The Relationship between Smoking Status and Depression Prevalence among First and Second Year Medical Students. *Bağimlik Derg*. 2006;7(3):129-134.
110. Marwat MA. Prevalence of depression and the use of antidepressants among third year medical students of khyber medical college, Peshawar. *J Postgrad Med Inst*. 2013;27(1):26-28.
111. Matheson KM, Barrett T, Landine J, McLuckie A, Soh NL-W, Walter G. Experiences of Psychological Distress and Sources of Stress and Support During Medical Training: a Survey of Medical Students. *Acad Psychiatry J Am Assoc Dir Psychiatr Resid Train Assoc Acad Psychiatry*. 2016;40(1):63-68.
112. Mayda AS, Şen M, Tekeli AH, Sayan S, Sirakaya N. DÜZCE ÜNİVERSİTESİ TIP FAKÜLTESİ ÖĞRENCİLERİNDE DEPRESİF BELİRTİ SIKLIĞI ve BASKIN EL KULLANIMINA GÖRE FARKLILIĞI. *Gazi Med J*. 2010;21(1). <http://medicaljournal.gazi.edu.tr/index.php/GMJ/article/view/569>. Accessed September 27, 2016.
113. Mehanna Z, Richa S. Prévalence des troubles anxio-dépressifs chez les étudiants en médecine. Étude transversale chez les étudiants en médecine de l'Université Saint-Joseph de Beyrouth. = Prevalence of anxiety and depressive disorders in medical students: Transversal study in medical students in the Saint-Joseph University of Beirut. *Encéphale Rev Psychiatr Clin Biol Thérapeutique*. 2006;32(6, Pt 1):976-982. doi:10.1016/S0013-7006(06)76276-5.
114. Melo-Carrillo A, Van Oudenhove L, Lopez-Avila A. Depressive symptoms among Mexican medical students: high prevalence and the effect of a group psychoeducation intervention. *J Affect Disord*. 2012;136(3):1098-1103. doi:10.1016/j.jad.2011.10.040.



115. Menezes RG, Subba SH, Sathian B, et al. Suicidal ideation among students of a medical college in Western Nepal: A cross-sectional study. *Leg Med.* 2012;14(4):183-187.
116. Miletic V, Lukovic JA, Ratkovic N, Aleksic D, Grgurevic A. Demographic risk factors for suicide and depression among Serbian medical school students. *Soc Psychiatry Psychiatr Epidemiol.* 2015;50(4):633-638. doi:10.1007/s00127-014-0950-9.
117. Mojs EH, Warchol-Biedermann K, Głowacka MDD, Strzelecki W, Ziemska B, Samborski W. Are students prone to depression and suicidal thoughts? *Arch Med Sci.* 2015;11(3):605-611.
118. Mosley TH, Perrin SG, Neral SM, Dubbert PM, Grothues CA, Pinto BM. Stress, coping, and well-being among third-year medical students. *Acad Med J Assoc Am Med Coll.* 1994;69(9):765-767.
119. Mousa OY, Dhmoon MS, Lander S, Dhmoon AS. The MD Blues: Under-Recognized Depression and Anxiety in Medical Trainees. *PLoS ONE.* 2016;11(6).
120. Naja WJ, Kansoun AH, Haddad RS. Prevalence of Depression in Medical Students at the Lebanese University and Exploring its Correlation With Facebook Relevance: A Questionnaire Study. *JMIR Res Protoc.* 2016;5(2):e96. doi:10.2196/resprot.4551.
121. Nasioudis D, Palaiodimos L, Dagiasis M, Katsarou A, Ntouros E. Depression in military medicine cadets: A cross-sectional study. *Mil Med Res.* 2015;2(1).
122. Nava FR, Tafoya SA, Heinze G. Estudio comparativo sobre depresión y los factores asociados en alumnos del primer año de la Facultad de Medicina y del internado. = A comparative study on depression and associated factors between medical 375 students of first and last academic years. *Salud Ment.* 2013;36(5):375-379.
123. Newbury-Birch D, Walshaw D, Kamali F. Drink and drugs: From medical students to doctors. *Drug Alcohol Depend.* 2001;64(3):265-270. doi:10.1016/S0376-8716(01)00128-4.
124. Okasha A, Lotaf F, Sadek A. Prevalence of suicidal feelings in a sample of non-consulting medical students. *Acta Psychiatr Scand.* 1981;63(5):409-415. doi:10.1111/j.1600-0447.1981.tb00690.x.
125. Oku A, Oku O, Owoaje E, Monjok E. An assessment of mental health status of undergraduate medical trainees in the university of Calabar, Nigeria: A cross-sectional study. *Maced J Med Sci.* 2015;3(2):356-362.
126. Osama M, Islam MY, Hussain SA, et al. Suicidal ideation among medical students of Pakistan: A cross-sectional study. *J Forensic Leg Med.* 2014;27((Osama M.;

- Islam M.Y.; Hussain S.A.; Masroor S.M.Z.; Burney M.U.; Masood M.A.) Dow Medical College, Dow University of Health Sciences, Karachi, Pakistan):65-68.
127. Pan X-F, Wen Y, Zhao Y, et al. Prevalence of depressive symptoms and its correlates among medical students in China: a national survey in 33 universities. *Psychol Health Med*. 2016;21(7):882-889. doi:10.1080/13548506.2015.1127395.
  128. Paro HBMS, Morales NMO, Silva CHM, et al. Health-related quality of life of medical students. *Med Educ*. 2010;44(3):227-235. doi:10.1111/j.1365-2923.2009.03587.x.
  129. Peleg-Sagy T, Shahar G. Depression and sexual satisfaction among female medical students: surprising findings from a pilot study. *Psychiatry*. 2012;75(2):167-175. doi:10.1521/psyc.2012.75.2.167.
  130. Peleg-Sagy T, Shahar G. The prospective associations between depression and sexual satisfaction among female medical students. *J Sex Med*. 2013;10(7):1737-1743. doi:10.1111/jsm.12176.
  131. Pereyra-Elías R, Ocampo-Mascaró J, Silva-Salazar V, et al. Prevalence and associated factors with depressive symptoms in health sciences students from a private university in lima, Peru 2010. *Rev Peru Med Exp Salud Publica*. 2010;27(4):520-526.
  132. Perveen S, Kazmi SF, ur Rehman A. RELATIONSHIP BETWEEN NEGATIVE COGNITIVE STYLE AND DEPRESSION AMONG MEDICAL STUDENTS. *J Ayub Med Coll Abbottabad JAMC*. 2016;28(1):94-98.
  133. Phillips LC, Burgos Y, Olmos Y, et al. Evaluation of depressive features in medical students, his knowledge and management. *Rev Hosp Psiquiatr Habana*. 2006;3(2).
  134. Pickard M, Bates L, Dorian M, Greig H, Saint D. Alcohol and drug use in second-year medical students at the University of Leeds. *Med Educ*. 2000;34(2):148-150. doi:10.1046/j.1365-2923.2000.00491.x.
  135. Pillay N, Ramlall S, Burns JK. Spirituality, depression and quality of life in medical students in KwaZulu-Natal. *South Afr J Psychiatry*. 2016;22(1).
  136. Pinzón-Amado A, Guerrero S, Moreno K, Landínez C, Pinzón J. Ideación suicida en estudiantes de medicina: Prevalencia y factores asociados. = Suicide ideation among medical students: Prevalence and associated factors. *Rev Colomb Psiquiatr*. 2013;43(Suppl 1):47-55. doi:10.1016/j.rcp.2013.11.005.
  137. Prinz P, Hertrich K, Hirschfelder U, de Zwaan M. Burnout, depression and depersonalisation--psychological factors and coping strategies in dental and medical students. *GMS Z Für Med Ausbild*. 2012;29(1):Doc10. doi:10.3205/zma000780.

138. Quince TA, Wood DF, Parker RA, Benson J. Prevalence and persistence of depression among undergraduate medical students: a longitudinal study at one UK medical school. *BMJ Open*. 2012;2(4). doi:10.1136/bmjopen-2012-001519.
139. Rab F, Mamdou R, Nasir S. Rates of depression and anxiety among female medical students in Pakistan. *East Mediterr Health J Rev Santé Méditerranée Orient Al-Majallah Al-Şihhīyah Li-Sharq Al-Mutawassīṭ*. 2008;14(1):126-133.
140. Ristić-Ignjatović D, Hinić D, Jakovljević M, Fountoulakis K, Siepera M, Rancić N. A ten-year study of depressive symptoms in Serbian medical students. *Acta Clin Croat*. 2013;52(2):157-163.
141. Rizvi F, Qureshi A, Rajput A, Afzal M. Prevalence of Depression, Anxiety and Stress (by DASS Scoring System) among Medical Students in Islamabad, Pakistan. *Br J Med Med Res*. 2015;8(1):69-75. doi:10.9734/BJMMR/2015/17193.
142. Roh M-S, Jeon HJ, Kim H, Cho HJ, Han SK, Hahm B-J. Factors influencing treatment for depression among medical students: a nationwide sample in South Korea. *Med Educ*. 2009;43(2):133-139. doi:10.1111/j.1365-2923.2008.03255.x.
143. Romo-Nava F, Tafoya SA, Gutierrez-Soriano J, et al. The association between chronotype and perceived academic stress to depression in medical students. *Chronobiol Int*. August 2016:1-10. doi:10.1080/07420528.2016.1217230.
144. Rosal MC, Ockene IS, Ockene JK, Barrett SV, Ma Y, Hebert JR. A longitudinal study of students' depression at one medical school. *Acad Med J Assoc Am Med Coll*. 1997;72(6):542-546.
145. Saeed AA, Bahnassy AA, Al-Hamdan NA, Almudhaibery FS, Alyahya AZ. Perceived stress and associated factors among medical students. *J Fam Community Med*. 2016;23(3):166-171. doi:10.4103/2230-8229.189132.
146. Samaranayake CB, Fernando AT. Satisfaction with life and depression among medical students in Auckland, New Zealand. *N Z Med J*. 2011;124(1341):12-17.
147. Saravanan C, Wilks R. Medical students' experience of and reaction to stress: the role of depression and anxiety. *ScientificWorldJournal*. 2014;2014:737382. doi:10.1155/2014/737382.
148. Schwenk TL, Davis L, Wimsatt LA. Depression, stigma, and suicidal ideation in medical students. *JAMA*. 2010;304(11):1181-1190. doi:10.1001/jama.2010.1300.
149. Serra RD, e Dinato SLM, Caseiro MM. Prevalence of depressive and anxiety symptoms in medical students in the city of Santos. *J Bras Psiquiatr*. 2015;64(3):213-220.

150. Seweryn M, Tyrala K, Kolarczyk-Haczyk A, Bonk M, Bulska W, Krysta K. Evaluation of the level of depression among medical students from Poland, Portugal and Germany. *Psychiatr Danub*. 2015;27 Suppl 1:S216-222.
151. Shah AA, Bazargan-Hejazi S, Lindstrom RW, Wolf KE. Prevalence of at-risk drinking among a national sample of medical students. *Subst Abuse*. 2009;30(2):141-149. doi:10.1080/08897070902802067.
152. Shariatpanaahi MV, Shariatpanaahi ZV, Moshtaaghi M, Shahbaazi SH, Abadi A. The relationship between depression and serum ferritin level. *Eur J Clin Nutr*. 2007;61(4):532-535.
153. Shen L, Kong H, Hou X. Prevalence of irritable bowel syndrome and its relationship with psychological stress status in Chinese university students. *J Gastroenterol Hepatol Aust*. 2009;24(12):1885-1890.
154. Sherina MS, Rampal L, Kaneson N. Psychological stress among undergraduate medical students. *Med J Malaysia*. 2004;59(2):207-211.
155. Shi M, Liu L, Yang Y-L, Wang L. The mediating role of self-esteem in the relationship between big five personality traits and depressive symptoms among Chinese undergraduate medical students. *Personal Individ Differ*. 2015;83:55-59. doi:10.1016/j.paid.2015.03.050.
156. Shi M, Liu L, Wang ZY, Wang L. Prevalence of depressive symptoms and its correlations with positive psychological variables among Chinese medical students: An exploratory cross-sectional study. *BMC Psychiatry*. 2016;16.
157. Shindel AW, Eisenberg ML, Breyer BN, Sharlip ID, Smith JF. Sexual function and depressive symptoms among female North American medical students. *J Sex Med*. 2011;8(2):391-399. doi:10.1111/j.1743-6109.2010.02085.x.
158. Sidana S, Kishore J, Ghosh V, Gulati D, Jiloha R, Anand T. Prevalence of depression in students of a medical college in New Delhi: A cross-sectional study. *Australas Med J*. 2012;5(5):247-250. doi:10.4066/AMJ.2012.750.
159. Smith CK, Peterson DF, Degenhardt BF, Johnson JC. Depression, anxiety, and perceived hassles among entering medical students. *Psychol Health Med*. 2007;12(1):31-39. doi:10.1080/13548500500429387.
160. Smith JF, Breyer BN, Eisenberg ML, Sharlip ID, Shindel AW. Sexual function and depressive symptoms among male North American medical students. *J Sex Med*. 2010;7(12):3909-3917. doi:10.1111/j.1743-6109.2010.02033.x.
161. Smith JF, Breyer BN, Shindel AW. Predictors of sexual bother in a population of male North American medical students. *J Sex Med*. 2011;8(12):3363-3369. doi:10.1111/j.1743-6109.2011.02463.x.

162. Sobowale K, Zhou N, Fan J, Liu N, Sherer R. Depression and suicidal ideation in medical students in China: a call for wellness curricula. *Int J Med Educ*. 2014;5:31-36. doi:10.5116/ijme.52e3.a465.
163. Sreeramareddy CT, Shankar PR, Binu VS, Mukhopadhyay C, Ray B, Menezes RG. Psychological morbidity, sources of stress and coping strategies among undergraduate medical students of Nepal. *BMC Med Educ*. 2007;7:26. doi:10.1186/1472-6920-7-26.
164. Sun L, Sun L-N, Sun Y-H, et al. Correlations between psychological symptoms and social relationships among medical undergraduates in Anhui Province of China. *Int J Psychiatry Med*. 2011;42(1):29-47. doi:10.2190/PM.42.1.c.
165. Supe AN. A study of stress in medical students at Seth G.S. Medical College. *J Postgrad Med*. 1998;44(1):1-6.
166. Tang Q-S. Mental survey in female students from a medical college of Guangxi during the epidemic period of severe acute respiratory syndrome. *Chin J Clin Rehabil*. 2005;9(32):90-91.
167. Thomas MR, Dyrbye LN, Huntington JL, et al. How do distress and well-being relate to medical student empathy? A multicenter study. *J Gen Intern Med*. 2007;22(2):177-183. doi:10.1007/s11606-006-0039-6.
168. Thompson D, Goebert D, Takeshita J. A program for reducing depressive symptoms and suicidal ideation in medical students. *Acad Med J Assoc Am Med Coll*. 2010;85(10):1635-1639. doi:10.1097/ACM.0b013e3181f0b49c.
169. Thompson G, McBride RB, Hosford CC, Halaas G. Resilience Among Medical Students: The Role of Coping Style and Social Support. *Teach Learn Med*. 2016;28(2):174-182. doi:10.1080/10401334.2016.1146611.
170. Tin TS, Sidik SM, Rampal L, Ibrahim N. Prevalence and predictors of suicidality among medical students in a public university. *Med J Malaysia*. 2015;70(1):1-5.
171. Tjia J, Givens JL, Shea JA. Factors associated with undertreatment of medical student depression. *J Am Coll Health J ACH*. 2005;53(5):219-224. doi:10.3200/JACH.53.5.219-224.
172. Tran QA, Dunne MP, Van Vo T, Luu NH. Adverse childhood experiences and the health of university students in eight provinces of Vietnam. *Asia Pac J Public Health*. 2015;27(8, Suppl):26S-32S. doi:10.1177/1010539515589812.
173. Tyssen R, Vaglum P, Grønvold NT, Ekeberg Ø. Suicidal ideation among medical students and young physicians: A nationwide and prospective study of prevalence and predictors. *J Affect Disord*. 2001;64(1):69-79. doi:10.1016/S0165-0327(00)00205-6.

174. Valle R, Sánchez E, Perales A. [Depressive symptomatology and alcohol-related problems during the academic training of medical students]. *Rev Peru Med Exp Salud Pública*. 2013;30(1):54-57.
175. Vankar JR, Prabhakaran A, Sharma H. Depression and stigma in medical students at a private medical college. *Indian J Psychol Med*. 2014;36(3):246-254. doi:10.4103/0253-7176.135372.
176. Vaysse B, Gignon M, Zerkly S, Ganry O. [Alcohol, tobacco, cannabis, anxiety and depression among second-year medical students. Identify in order to act]. *Sante Publique Vandoeuvre--Nancy Fr*. 2014;26(5):613-620.
177. Vitaliano PP, Maiuro RD, Russo J, Mitchell ES, Carr JE, Van Citters RL. A biopsychosocial model of medical student distress. *J Behav Med*. 1988;11(4):311-331.
178. Voltmer E, Kötter T, Spahn C. Perceived medical school stress and the development of behavior and experience patterns in German medical students. *Med Teach*. 2012;34(10):840-847. doi:10.3109/0142159X.2012.706339.
179. Walkiewicz M, Tartas M, Majkovicz M, Budzinski W. Academic achievement, depression and anxiety during medical education predict the styles of success in a medical career: a 10-year longitudinal study. *Med Teach*. 2012;34(9):e611-619. doi:10.3109/0142159X.2012.687478.
180. Wallin U, Runeson B. Attitudes towards suicide and suicidal patients among medical students. *Eur Psychiatry J Assoc Eur Psychiatr*. 2003;18(7):329-333.
181. Wan YH, Gao R, Tao XY, Tao FB, Hu CL. [Relationship between deliberate self-harm and suicidal behaviors in college students]. *Zhonghua Liu Xing Bing Xue Za Zhi Zhonghua Liuxingbingxue Zazhi*. 2012;33(5):474-477.
182. Waqas A, Rehman A, Malik A, Muhammad U, Khan S, Mahmood N. Association of Ego Defense Mechanisms with Academic Performance, Anxiety and Depression in Medical Students: A Mixed Methods Study. *Cureus*. 2015;7(9):e337. doi:10.7759/cureus.337.
183. Wege N, Muth T, Li J, Angerer P. Mental health among currently enrolled medical students in Germany. *Public Health*. 2016;132((Wege N., natalia.wege@uni-duesseldorf.de; Muth T.; Li J.; Angerer P.) Institute of Occupational Medicine and Social Medicine, Centre of Health and Society (CHS), Faculty of Medicine, University of Duesseldorf, Germany):92-100.
184. Wimsatt LA, Schwenk TL, Sen A. Predictors of depression stigma in medical students: Potential targets for prevention and education. *Am J Prev Med*. 2015;49(5):703-714. doi:10.1016/j.amepre.2015.03.021.

185. Wolf MR, Rosenstock JB. Inadequate Sleep and Exercise Associated with Burnout and Depression Among Medical Students. *Acad Psychiatry J Am Assoc Dir Psychiatr Resid Train Assoc Acad Psychiatry*. March 2016. doi:10.1007/s40596-016-0526-y.
186. Wongpakaran N, Wongpakaran T. The Thai version of the PSS-10: An Investigation of its psychometric properties. *Biopsychosoc Med*. 2010;4. doi:10.1186/1751-0759-4-6.
187. Yang F, Meng H, Chen H, et al. Influencing factors of mental health of medical students in China. *J Huazhong Univ Sci Technol Med Sci Hua Zhong Ke Ji Xue Xue Bao Yi Xue Ying Wen Ban Huazhong Keji Daxue Xuebao Yixue Yingdewen Ban*. 2014;34(3):443-449. doi:10.1007/s11596-014-1298-9.
188. Yilmaz Y, Vural E, Toprak DE, et al. The relationship between medical education and eating habits along with mental condition in medical students. *Erciyes Tip Derg*. 2014;36(2):75-81.
189. Yoon S, Lee Y, Han C, et al. Usefulness of the Patient Health Questionnaire-9 for Korean medical students. *Acad Psychiatry J Am Assoc Dir Psychiatr Resid Train Assoc Acad Psychiatry*. 2014;38(6):661-667. doi:10.1007/s40596-014-0140-9.
190. Youssef FF. Medical Student Stress, Burnout and Depression in Trinidad and Tobago. *Acad Psychiatry J Am Assoc Dir Psychiatr Resid Train Assoc Acad Psychiatry*. 2016;40(1):69-75.
191. Yusoff MSB, Abdul Rahim AF, Baba AA, Ismail SB, Mat Pa MN, Esa AR. The impact of medical education on psychological health of students: a cohort study. *Psychol Health Med*. 2013;18(4):420-430. doi:10.1080/13548506.2012.740162.
192. Yusoff MSB. Associations of pass-fail outcomes with psychological health of first-year medical students in a Malaysian medical school. *Sultan Qaboos Univ Med J*. 2013;13(1):107-114.
193. Zeldow PB, Daugherty SR, Clark DC. Masculinity, femininity, and psychosocial adjustment in medical students: a 2-year follow-up. *J Pers Assess*. 1987;51(1):3-14. doi:10.1207/s15327752jpa5101\_1.
194. Zoccolillo M, Murphy GE, Wetzel RD. Depression among medical students. *J Affect Disord*. 1986;11(1):91-96.
195. Ali RV, Vankar GK. Psychoactive substance use among medical students. *Indian J Psychiatry*. 1994;36(3):138-140.
196. Williams JW, Pignone M, Ramirez G, Perez Stellato C. Identifying depression in primary care: a literature synthesis of case-finding instruments. *Gen Hosp Psychiatry*. 2002;24(4):225-237.

197. Yeung A, Howarth S, Chan R, Sonawalla S, Nierenberg AA, Fava M. Use of the Chinese version of the Beck Depression Inventory for screening depression in primary care. *J Nerv Ment Dis*. 2002;190(2):94-99.
198. Wang Y-P, Gorenstein C. Assessment of depression in medical patients: a systematic review of the utility of the Beck Depression Inventory-II. *Clin Sao Paulo Braz*. 2013;68(9):1274-1287. doi:10.6061/clinics/2013(09)15.
199. Nieuwenhuijsen K, de Boer AGEM, Verbeek JH a. M, Blonk RWB, van Dijk FJH. The Depression Anxiety Stress Scales (DASS): detecting anxiety disorder and depression in employees absent from work because of mental health problems. *Occup Environ Med*. 2003;60 Suppl 1:i77-82.
200. Lehr D, Hillert A, Schmitz E, Sosnowsky N. Screening depressiver Störungen mittels Allgemeiner Depressions-Skala (ADS-K) und State-Trait Depressions Scales (STDS-T): Eine vergleichende Evaluation von Cut-Off-Werten. *Diagnostica*. 2008;54(2):61-70. doi:10.1026/0012-1924.54.2.61.
201. Kasantikul D, Karnjanathanalers N, Limsuwan N, et al. Health-related self-report (HRSR) scale: the diagnostic screening test for depression in Thai population. *J Med Assoc Thail Chotmai het Thangphaet*. 1997;80(10):647-657.
202. Olsson I, Mykletun A, Dahl AA. The Hospital Anxiety and Depression Rating Scale: a cross-sectional study of psychometrics and case finding abilities in general practice. *BMC Psychiatry*. 2005;5:46. doi:10.1186/1471-244X-5-46.
203. LeBlanc JC, Almudevar A, Brooks SJ, Kutcher S. Screening for adolescent depression: comparison of the Kutcher Adolescent Depression Scale with the Beck depression inventory. *J Child Adolesc Psychopharmacol*. 2002;12(2):113-126. doi:10.1089/104454602760219153.
204. Kroenke K, Spitzer RL, Williams JB. The PHQ-9: validity of a brief depression severity measure. *J Gen Intern Med*. 2001;16(9):606-613.
205. Campo-Arias A, Díaz-Martínez LA, Eduardo G, Jaimes R, Cadena LDP, Hernández NL. VALIDATION OF ZUNG'S SELF-RATING DEPRESSION SCALE AMONG THE COLOMBIAN GENERAL POPULATION. *Soc Behav Personal Int J*. 2006;34(1):87-94. doi:10.2224/sbp.2006.34.1.87.
